# Supplementary material for: Discovery of new pyridine heterocyclic hybrids; design, synthesis, dynamic simulations, and in vitro and in vivo breast cancer biological assays
Source: Royal Society of Chemistry journal article supplement (doi:10.1039/d3ra02875e), 2023-01-01
Supplement: d3ra02875e1.pdf [file d3ra02875e1.pdf]

## Supplementary material

### S1: <sup>1</sup>H-NMR of 3a:

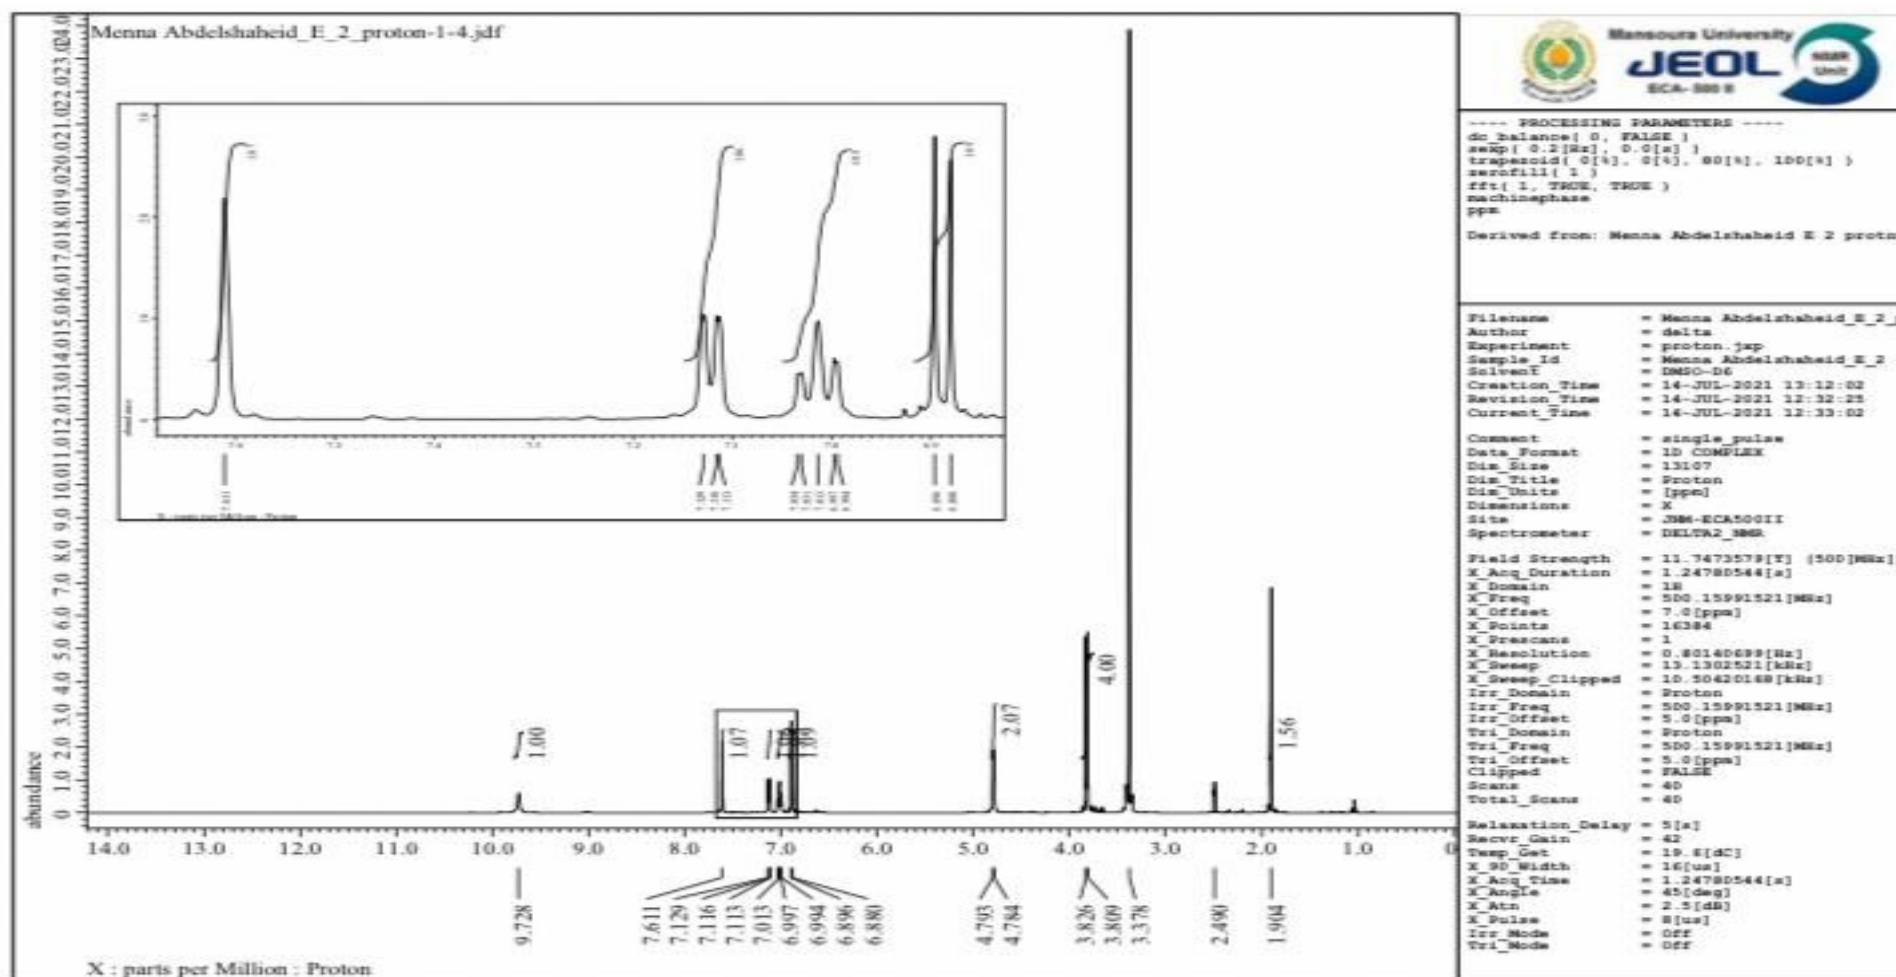

S2: <sup>1</sup>H-NMR of 3b:

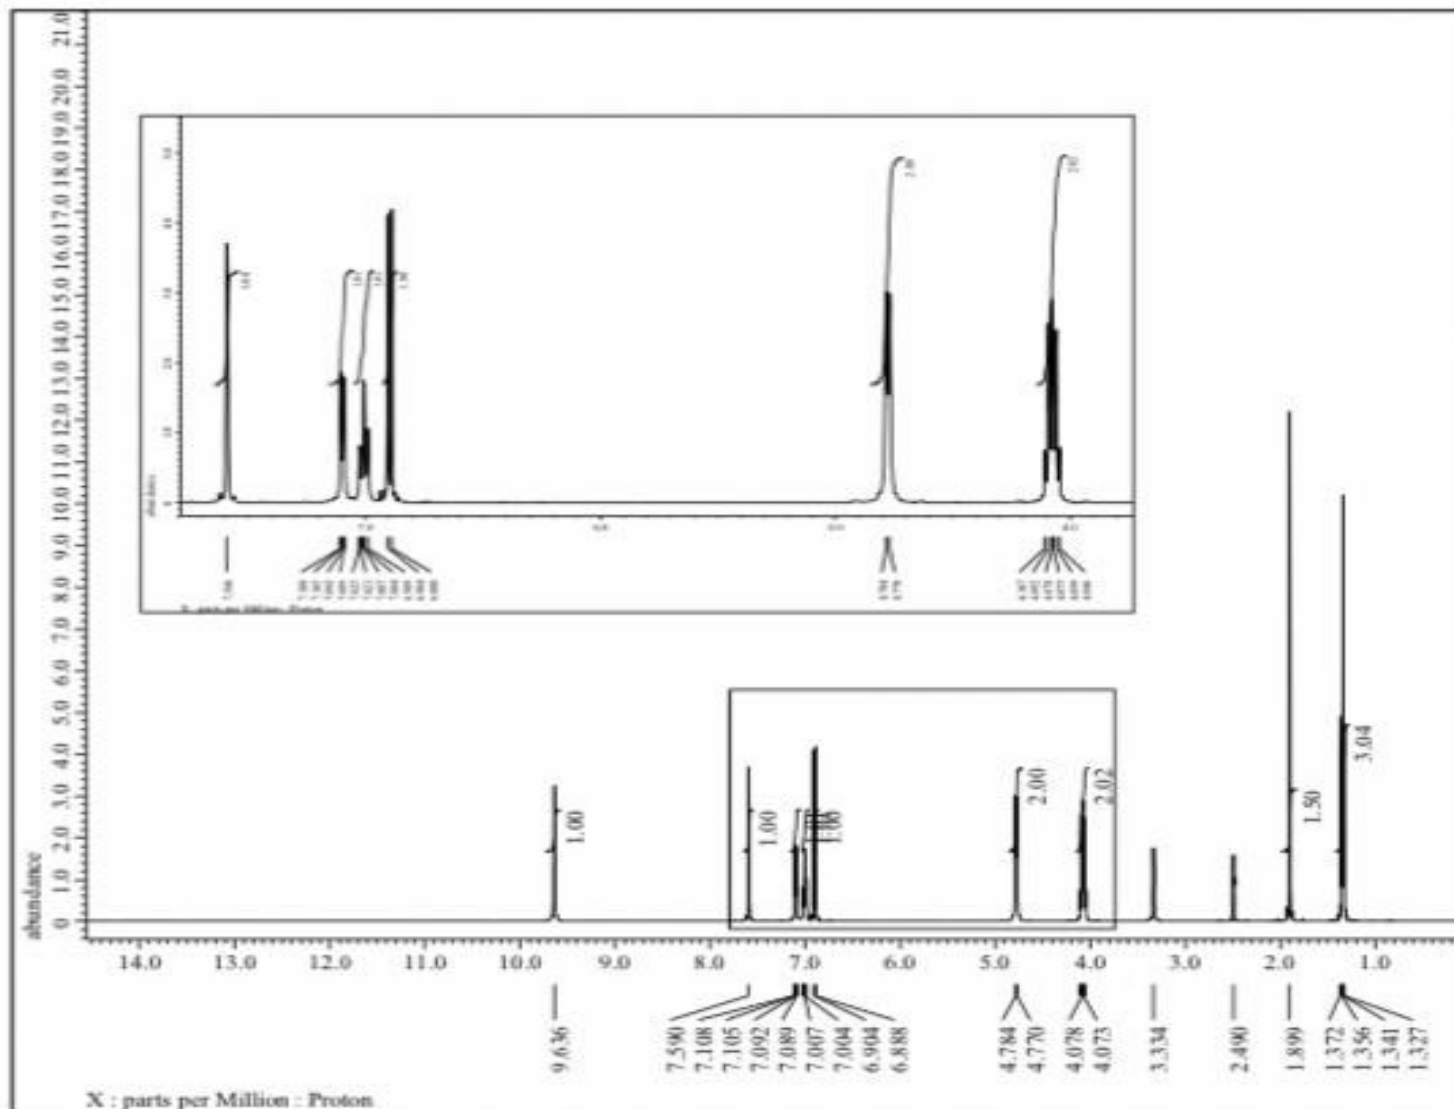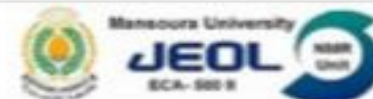

----- PROCESSING PARAMETERS -----  
 dc\_balance( 0, FALSE )  
 sweep( 0.2[Hz], 0.0[s] )  
 trapwidth( 0[%], 0[%], 80[%], 100[%] )  
 zerofill( 1 )  
 fft( 1, TRUE, TRUE )  
 machinephase  
 ppm  
 Derived from: Menna Abdelshahed\_V\_2\_protoc

Filename = Menna Abdelshahed\_V\_2\_j  
 Author = Aelita  
 Experiment = proton\_jep  
 Sample Id = Menna Abdelshahed\_V\_2  
 Solvent = DMSO-d6  
 Creation Time = 13-JUL-2021 14:37:39  
 Revision Time = 14-JUL-2021 11:19:25  
 Current File = 14-JUL-2021 11:19:07

Comment = single\_pulse  
 Data Format = 1D\_COMPLEX  
 Dia\_Size = 13107  
 Dia\_Title = Proton  
 Dia\_Units = [ppm]  
 Dimensions = X  
 Site = JNM-ECA500II  
 Spectrometer = DELTA2\_500  
 Field Strength = 500.15991321[MHz]  
 X\_Acq\_Duration = 1.24780544[s]  
 X\_Domain = 18  
 X\_Freq = 500.15991321[MHz]  
 X\_Offset = 7.0[ppm]  
 X\_Points = 16384  
 X\_Prescans = 1  
 X\_Resolution = 0.82140689[Hz]  
 X\_Sweep = 13.1302521[kHz]  
 X\_Sweep\_Clipped = 10.504320168[kHz]  
 Irr\_Domain = Proton  
 Irr\_Freq = 500.15991321[MHz]  
 Irr\_Offset = 5.0[ppm]  
 Tri\_Domain = Proton  
 Tri\_Freq = 500.15991321[MHz]  
 Tri\_Offset = 5.0[ppm]  
 Clipped = FALSE  
 Scans = 40  
 Total\_Scans = 40

Relaxation\_Delay = 5[s]  
 Recv\_Gain = 44  
 Sweep\_Gat = 20.1[μC]  
 X\_90\_Width = 16[μs]  
 X\_Acq\_Time = 1.24780544[s]  
 X\_Angle = 45[deg]  
 X\_Atn = 2.3[dB]  
 X\_Pulse = 8[μs]  
 Irr\_Mode = OFF  
 Tri\_Mode = OFF

### S3: <sup>1</sup>H-NMR of 3c:

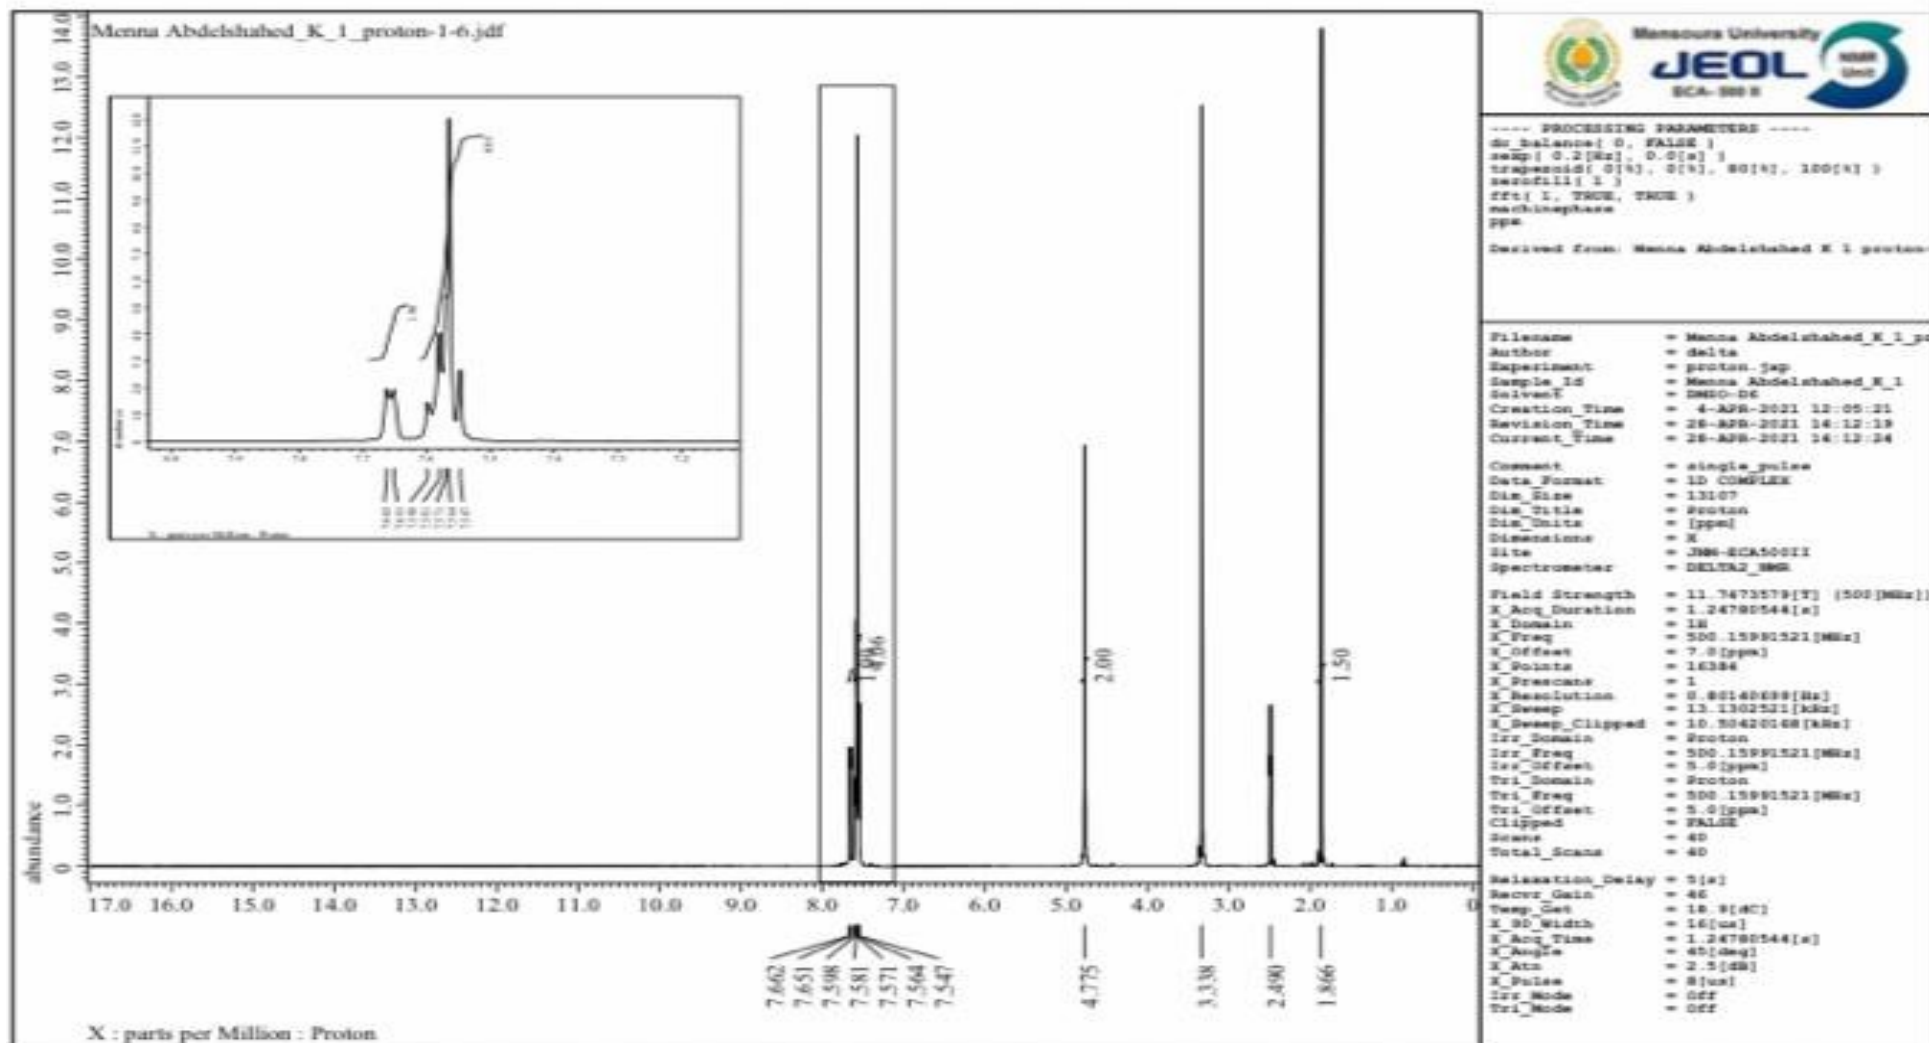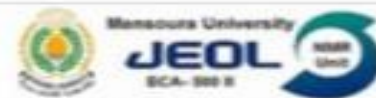

----- PROCESSING PARAMETERS -----  
 dr\_balance[ 0, FALSE ]  
 swep[ 0.2[Hz], 0.0[s] ]  
 trapasoid[ 0[%], 0[%], 80[%], 100[%] ]  
 swcfl[ 1 ]  
 rft[ 1, TRUE, TRUE ]  
 machinephase  
 ppm

Derived from: Menna Abdelshahed\_K\_1\_proton-

Filename = Menna Abdelshahed\_K\_1\_p  
 Author = delta  
 Experiment = proton.jep  
 Sample\_ID = Menna Abdelshahed\_K\_1  
 Solvent = DMSO-D6  
 Creation\_Time = 4-APR-2021 12:05:21  
 Revision\_Time = 28-APR-2021 14:12:19  
 Current\_Time = 28-APR-2021 14:12:24

Comment = single\_pulse  
 Data\_Format = 1D\_COMPLEX  
 Dia\_File = 13107  
 Dia\_Title = proton  
 Dia\_Units = [ppm]  
 Dimensions = X  
 Site = JNM-SCA500II  
 Spectrometer = DELTA2\_500

Field\_Strength = 11.7472579[T] (500[MHz])  
 X\_Acq\_Duration = 1.24780544[s]  
 X\_Domain = 18  
 X\_Freq = 500.15981521[MHz]  
 X\_Offset = 7.0[ppm]  
 X\_Points = 16384  
 X\_Prescan = 1  
 X\_Resolution = 0.80140699[Hz]  
 X\_Sweep = 13.1302531[kHz]  
 X\_Sweep\_Clipped = 10.50420168[kHz]  
 Xr\_Domain = proton  
 Xr\_Freq = 500.15981521[MHz]  
 Xr\_Offset = 5.0[ppm]  
 Xr\_Domain = proton  
 Xr\_Freq = 500.15981521[MHz]  
 Xr\_Offset = 5.0[ppm]  
 Clipped = FALSE  
 Scale = 40  
 Total\_Scans = 40

Relaxation\_Delay = 0[s]  
 Recor\_Gain = 46  
 Sweep\_Get = 16.8[Hz]  
 X\_90\_Width = 16[us]  
 X\_Acq\_Time = 1.24780544[s]  
 X\_Angle = 45[deg]  
 X\_Atts = 2.5[dB]  
 X\_Pulse = 8[us]  
 Xr\_Mode = Off  
 Xr\_Mode = Off

S4:  $^1\text{H-NMR}$  of 3d:

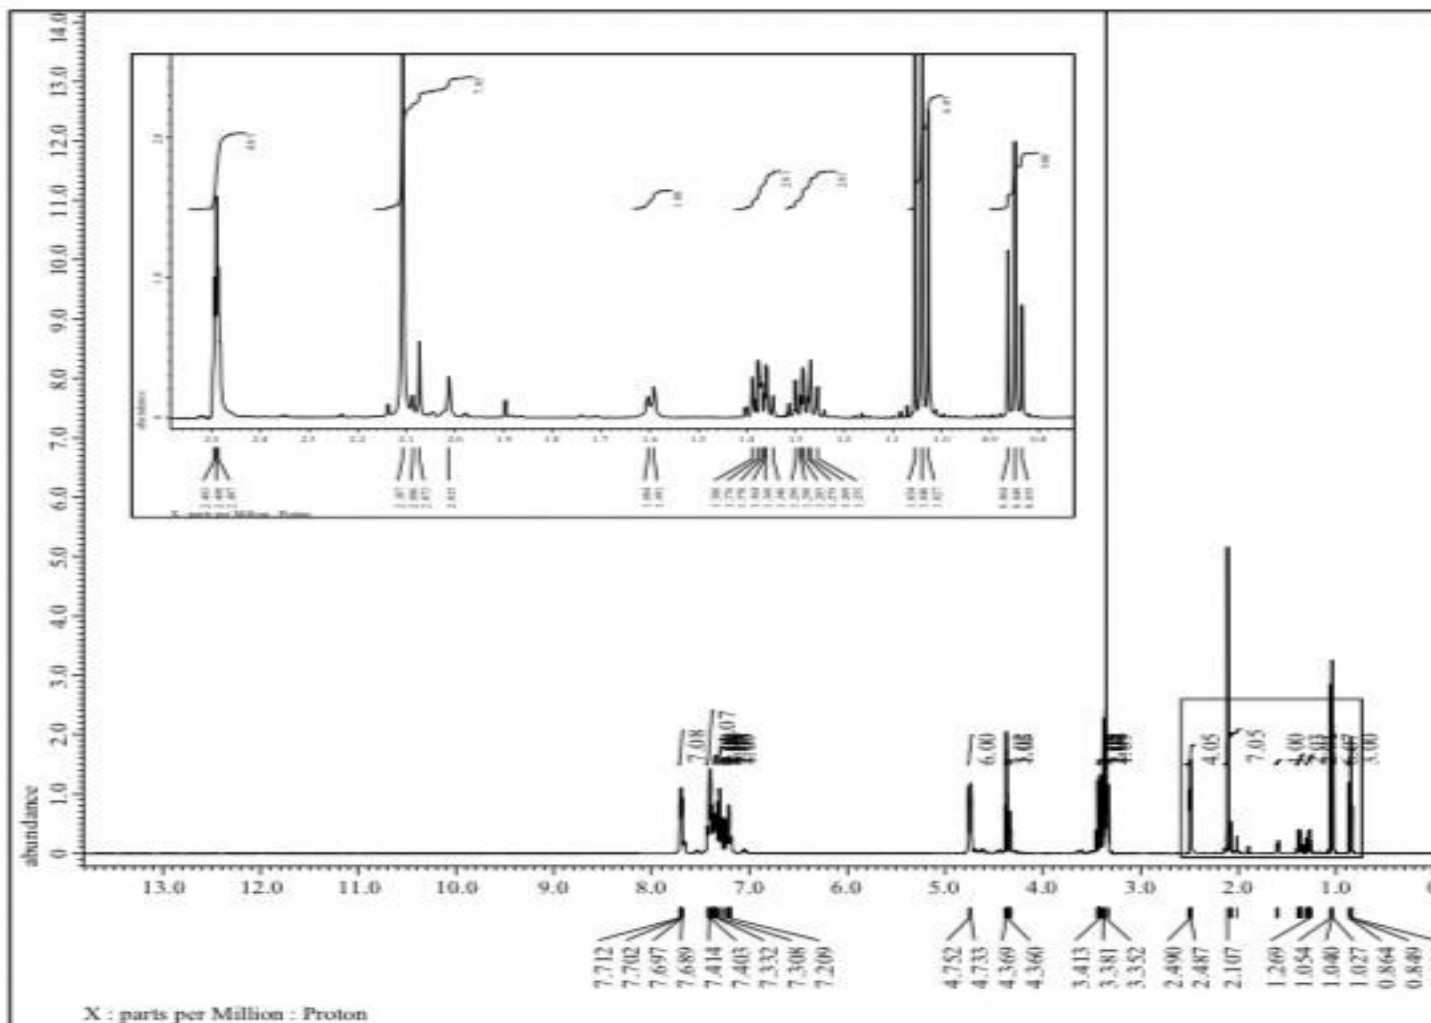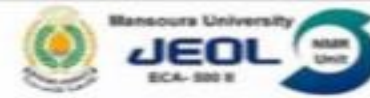

```

---- PROCESSING PARAMETERS ----
dc_balancc| 0, FALSE |
sweep| 0.2[Hz], 0.0[s] |
trapezoid| 0[%, 0[%, 00[%, 100[% |
zerofill| 1 |
fft| 1, TRUE, TRUE |
machine| ppa
Derived from: Menna Mahmoud Q 1 proton-1-1

Filename = Menna Mahmoud_Q_1_protoc
Author = delta
Experiment = proton.jxp
Sample Id = Menna Mahmoud_Q_1
Solvent = DMSO-d6
Creation Time = 16-MAR-2021 13:06:23
Revision Time = 16-MAR-2021 13:15:17
Current Time = 16-MAR-2021 13:15:27

Comment = single pulse
Data Format = 1D COMPLEX
Dir Size = 13107
Dir Title = Proton
Dir Units = [ppm]
Dimensions = 1
Site = JSM-ECA500II
Spectrometer = DELTA2_500

Field Strength = 11.7473579[T] (500[MHz])
K_Acq_Duration = 1.24780544[s]
K_Domain = 1H
K_Freq = 500.15991521[MHz]
K_Offset = 7.0[ppm]
K_Points = 16384
K_Prescans = 1
K_Resolution = 0.80140699[Hz]
K_Sweep = 13.1302531[kHz]
K_Sweep_Clipped = 10.50420168[kHz]
Irr_Domain = Proton
Irr_Freq = 500.15991521[MHz]
Irr_Offset = 5.0[ppm]
Tri_Domain = Proton
Tri_Freq = 500.15991521[MHz]
Tri_Offset = 5.0[ppm]
Clipped = TRUE
Scans = 40
Total_Scans = 40

Relaxation_Delay = 5[s]
Recvr_Gain = 50
Temp_Get = 18.1[4C]
K_90_Width = 16[us]
K_Acq_Time = 1.24780544[s]
K_Angle = 45[deg]
K_Atn = 2.5[db]
K_Pulse = 8[us]
Irr_Mode = ocr
Tri_Mode = ocr
    
```

S5: <sup>1</sup>H-NMR of 4a:

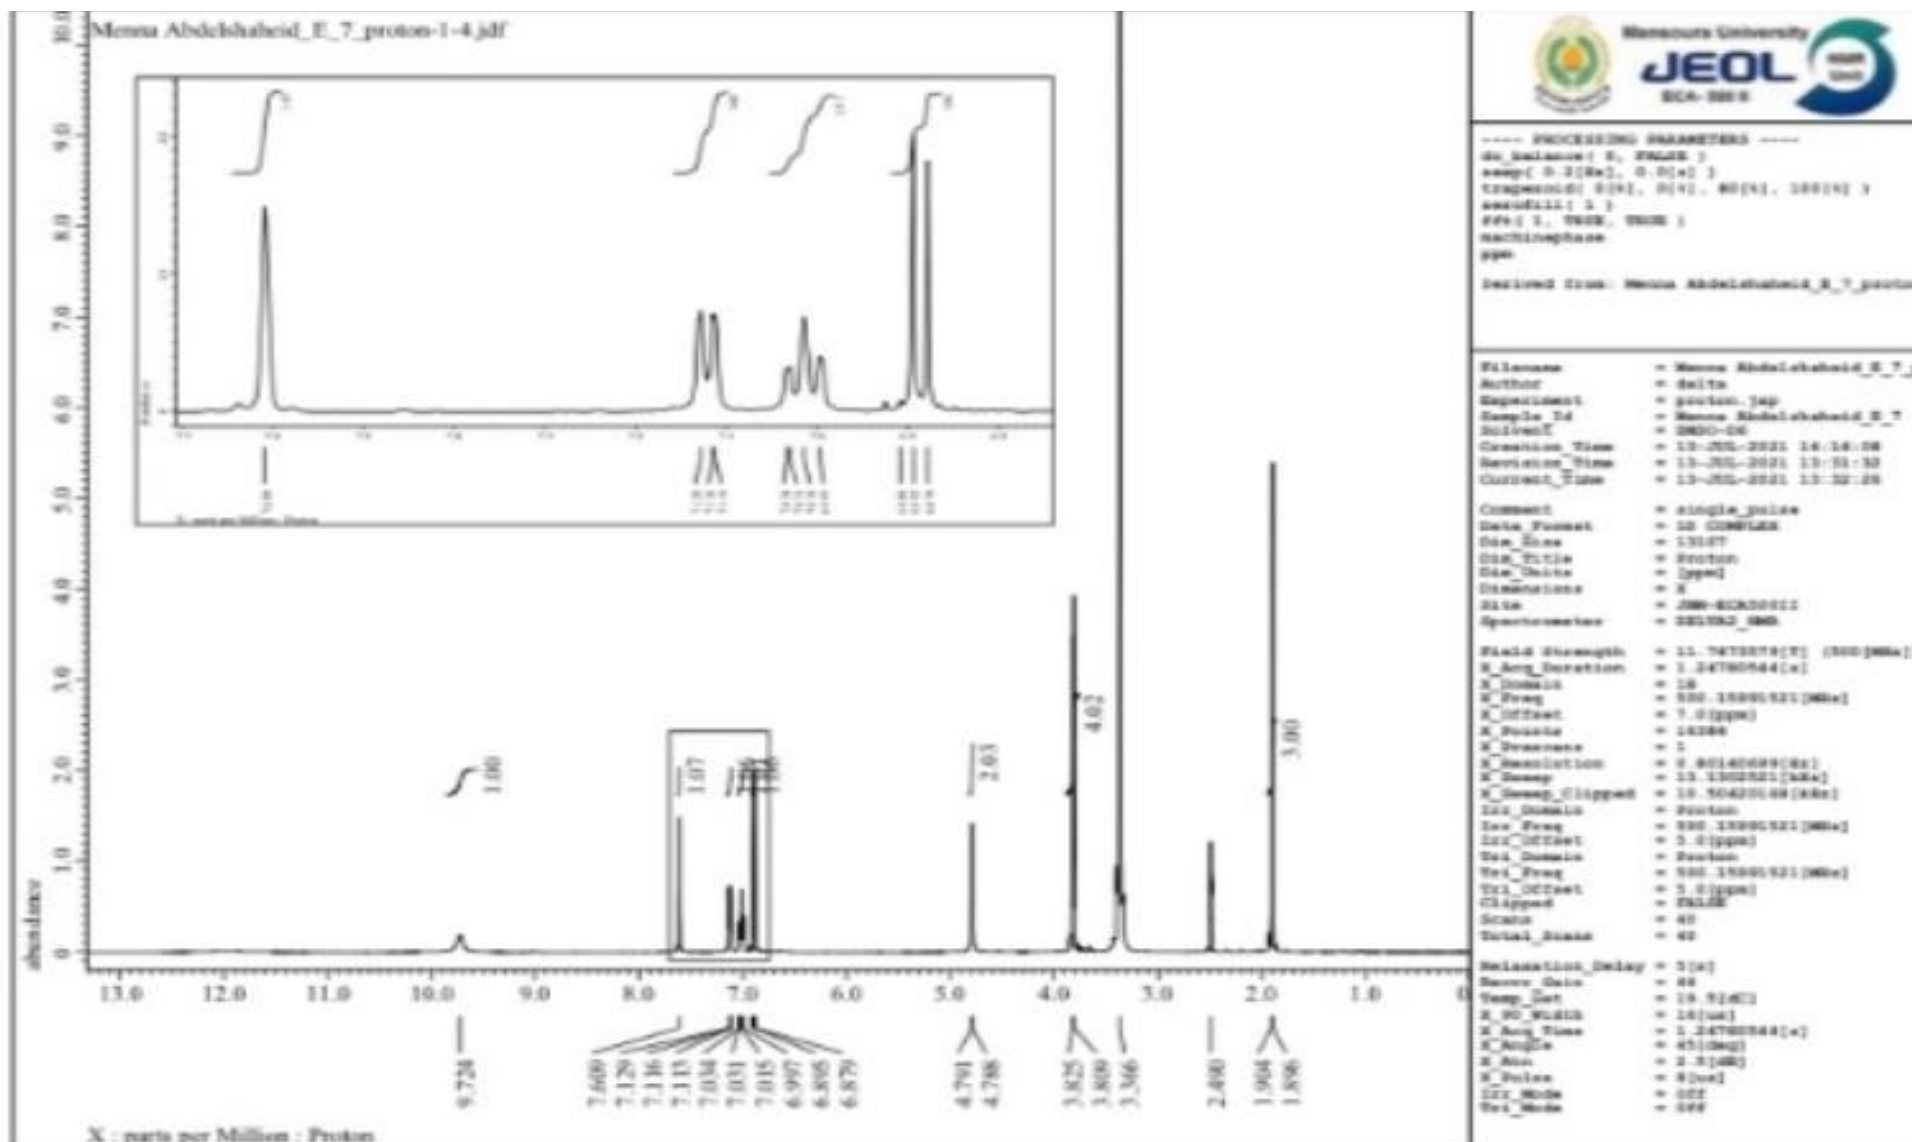

S6: <sup>1</sup>H-NMR of 4b:

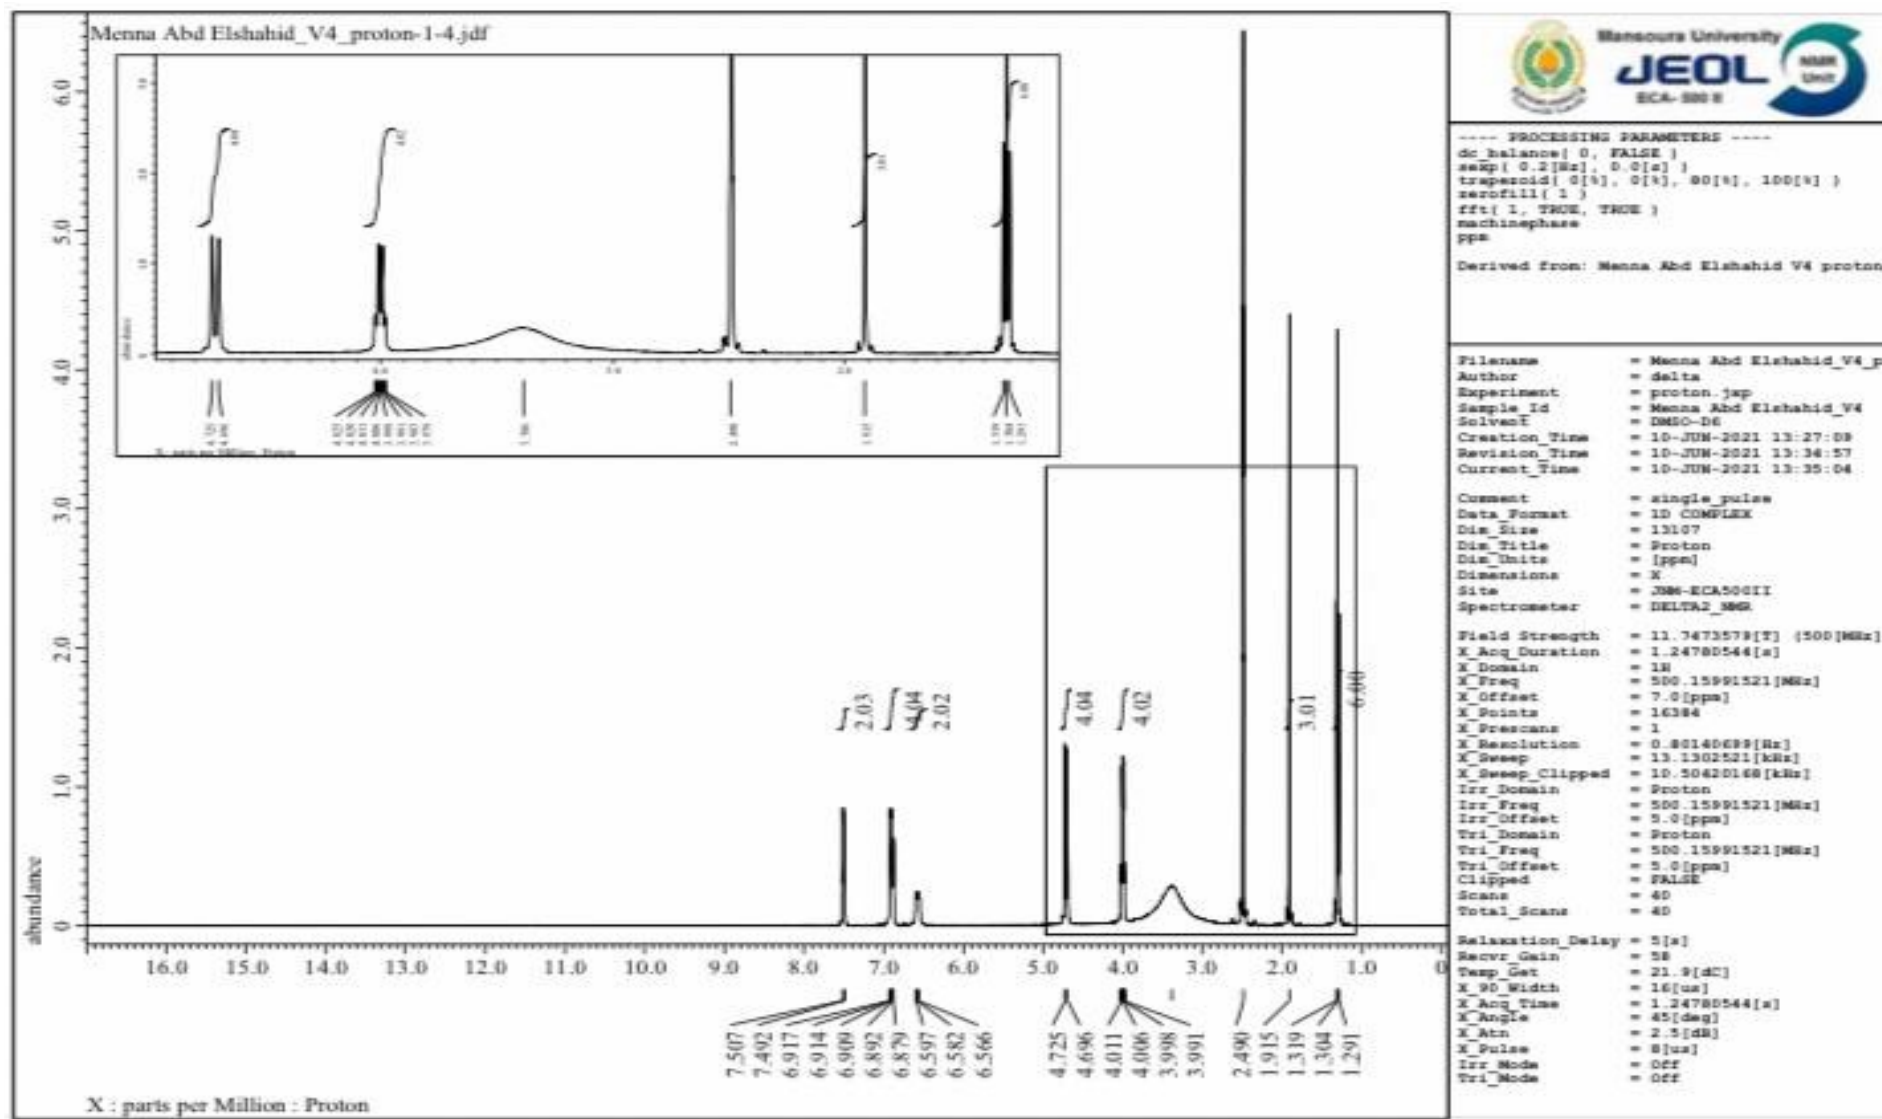

# S7: <sup>1</sup>H-NMR of 5a:

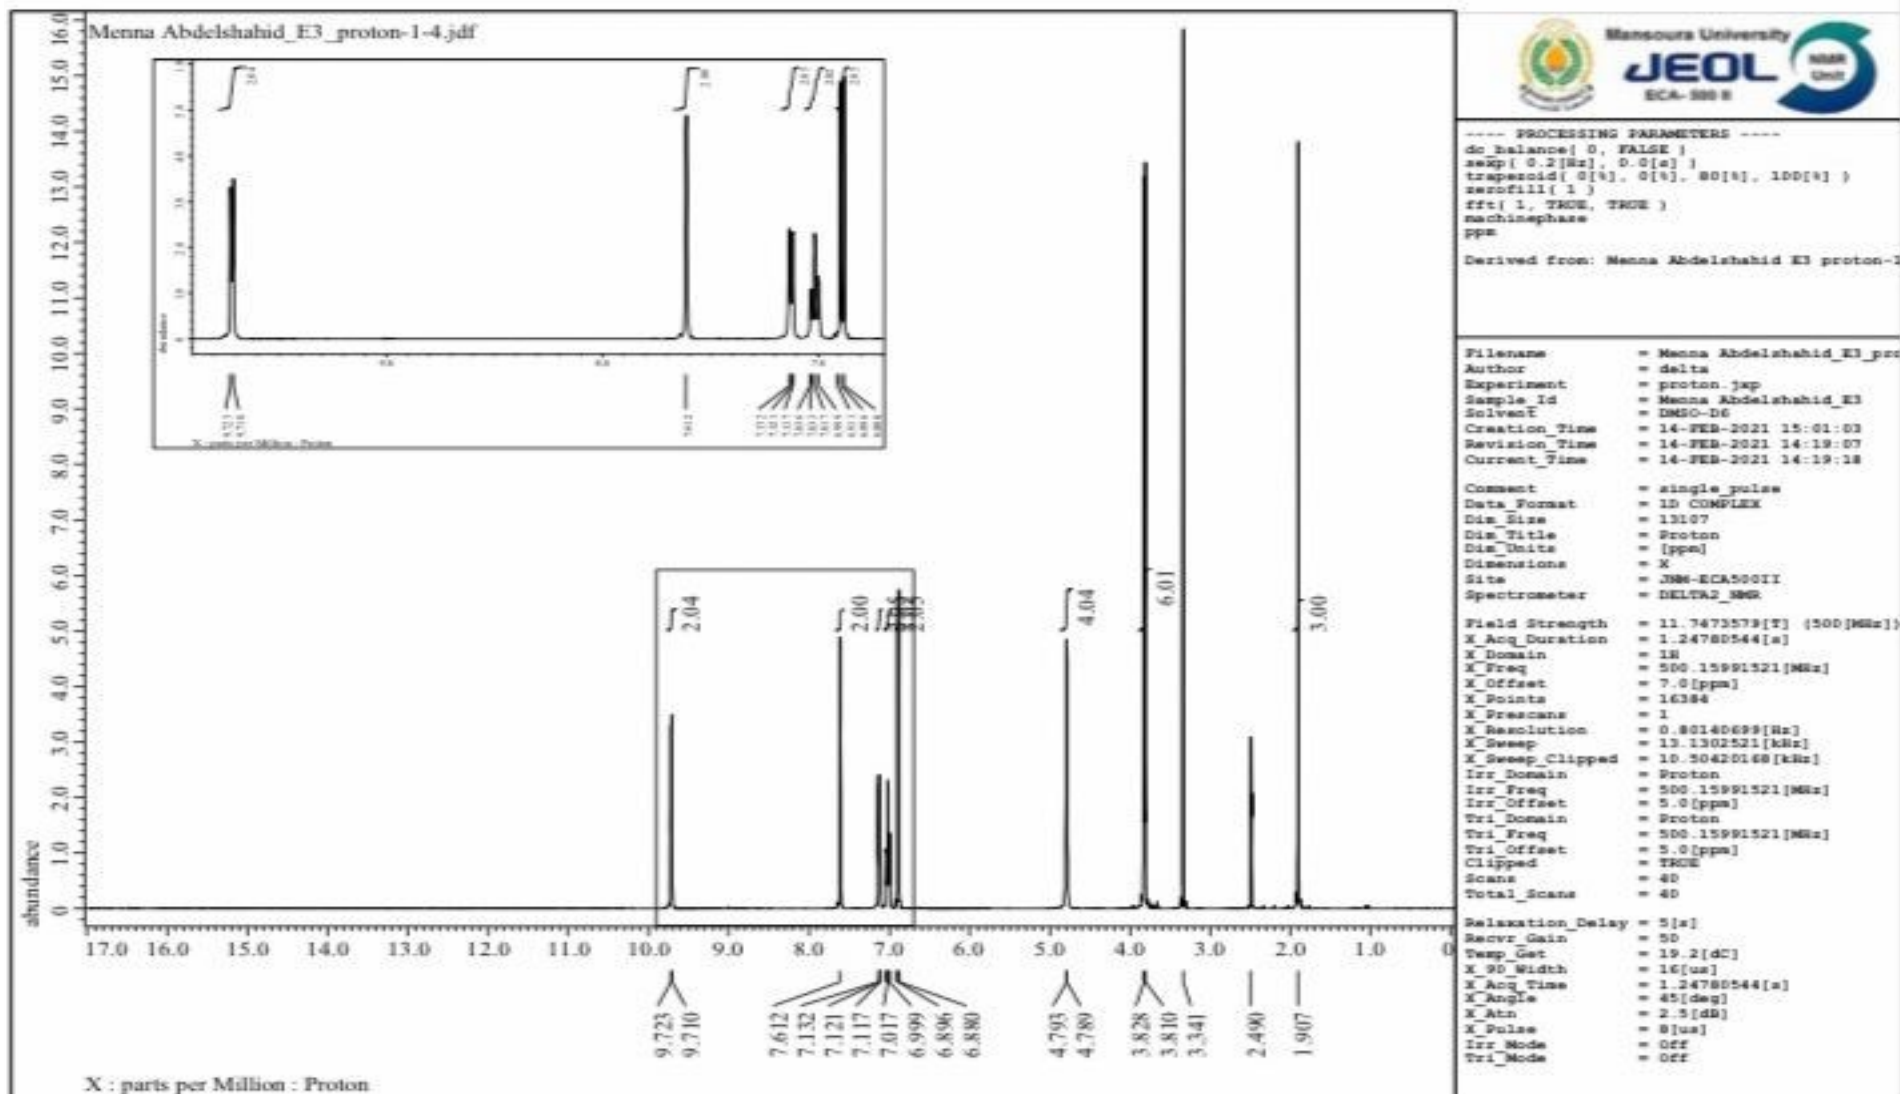

S8: <sup>1</sup>H-NMR of 5b:

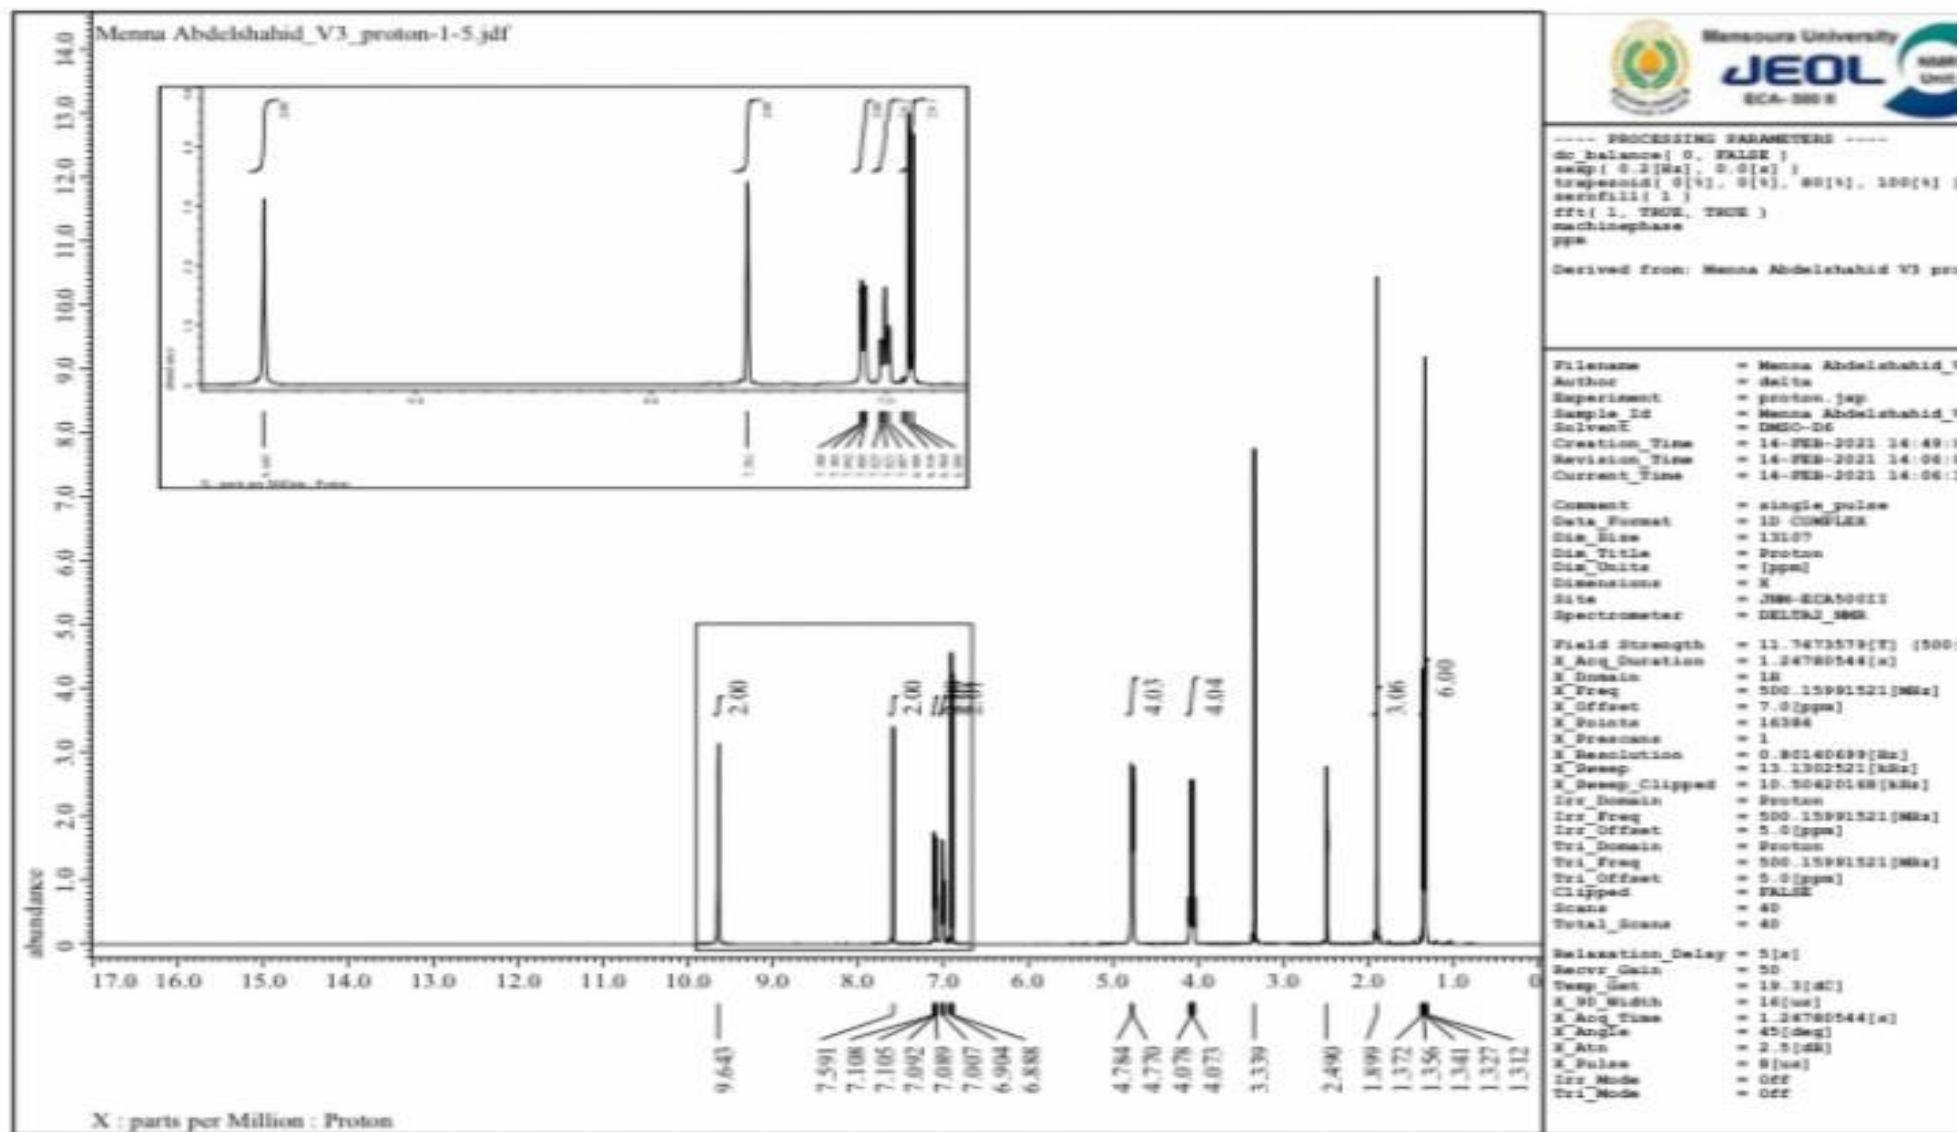



S9: <sup>13</sup>C-NMR of 3a:

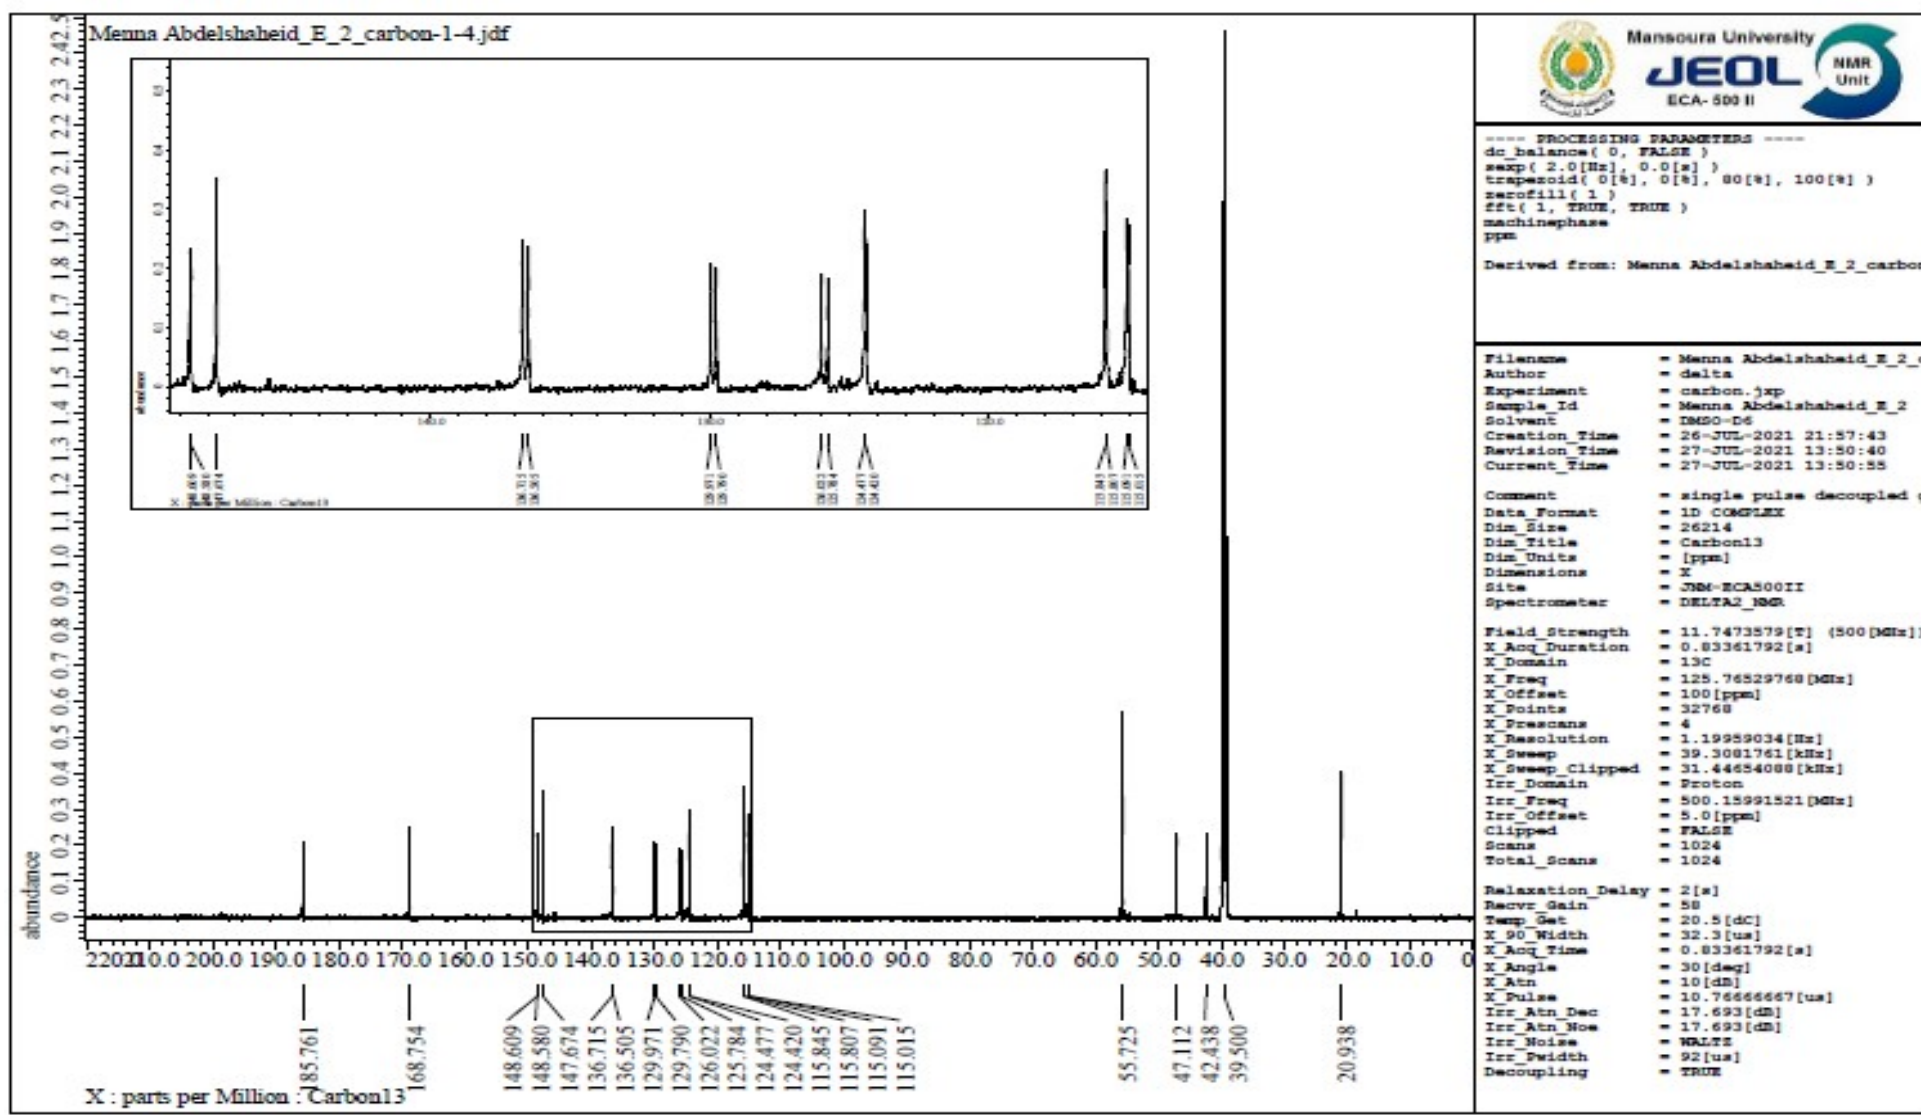

**S10:  $^{13}\text{C}$ -NMR of 3b:**

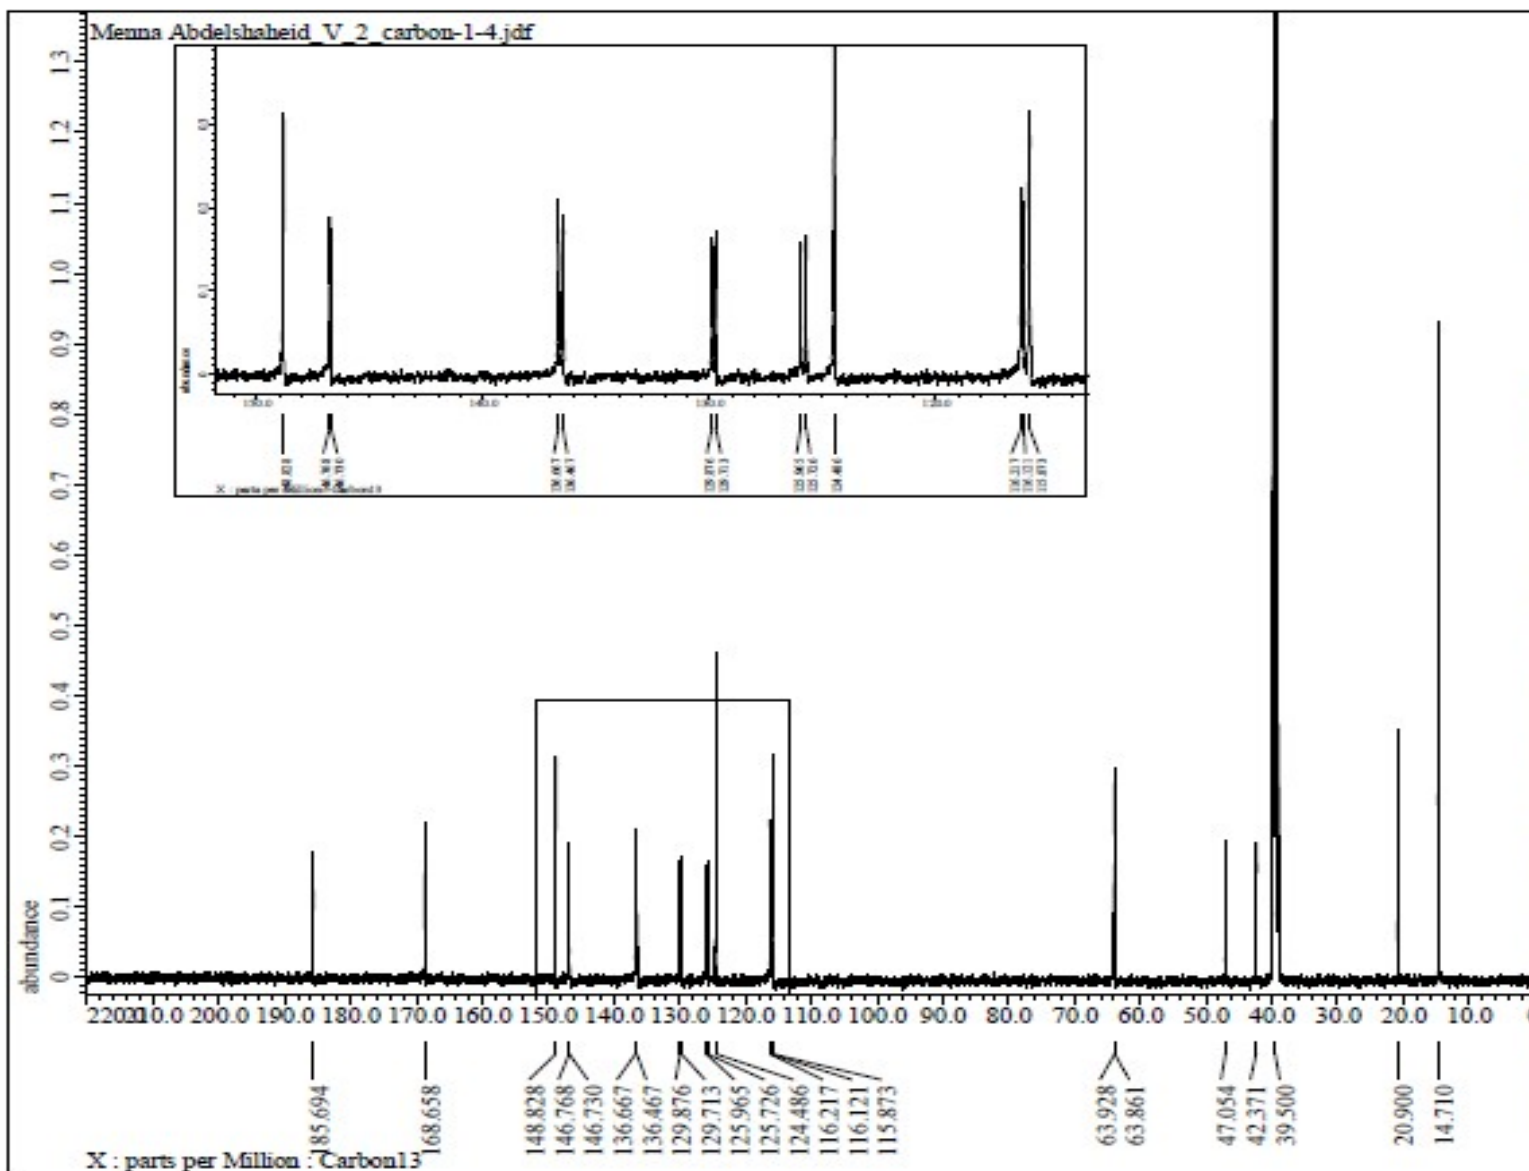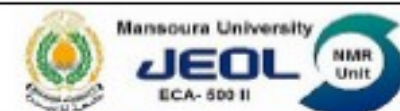

```

----- PROCESSING PARAMETERS -----
dc_balance( 0, FALSE )
sweep( 2.0[Hz], 0.0[s] )
trapezoid( 0[%, 0[%, 80[%, 100[%) )
zerofill( 1 )
fft( 1, TRUE, TRUE )
machinephase
ppm
Derived from: Menna Abdelshahid V 2_carbon

```

```

Filename      = Menna Abdelshahid V 2_c
Author       = delta
Experiment   = carbon.jxp
Sample Id    = Menna Abdelshahid V 2
Solvent      = DMSO-d6
Creation Time = 26-JUL-2021 22:54:56
Revision Time = 27-JUL-2021 13:52:57
Current Time  = 27-JUL-2021 13:53:04

```

```

Comment      = single pulse decoupled g
Data Format   = 1D COSYEX
Dim Size     = 26214
Dim Title    = Carbon13
Dim Units    = [ppm]
Dimensions   = X
Site         = JNM-ECA500II
Spectrometer = DELTA2 500

```

```

Field Strength = 11.7473579[T] (500[MHz])
X_Acq_Duration = 0.83361792[s]
X_Domain       = 13C
X_Freq         = 125.76529768 [MHz]
X_Offset       = 100[ppm]
X_Points       = 32768
X_Prescans     = 4
X_Resolution   = 1.19959034[Hz]
X_Sweep        = 39.3081761 [kHz]
X_Sweep_Clipped = 31.44654088 [kHz]
Irr_Domain     = Proton
Irr_Freq       = 500.15991521 [MHz]
Irr_Offset     = 5.0 [ppm]
Clipped        = FALSE
Scans          = 1024
Total_Scans    = 1024

```

```

Relaxation_Delay = 2[s]
Recvr_Gain       = 60
Temp_Set         = 20.0 [dC]
X_90_Width       = 32.3 [us]
X_Acq_Time       = 0.83361792[s]
X_Angle          = 30[deg]
X_Atn            = 10[dB]
X_Pulse          = 10.76666667[us]
Irr_Atn_Dec      = 17.693[dB]
Irr_Atn_Noise   = 17.693[dB]
Irr_Noise        = WALTZ
Irr_Pwidth       = 92[us]
Decoupling       = TRUE

```

# S11: <sup>13</sup>C-NMR of 3d:

Menna Abdelshaheed-Q10-CNMR-DMSO-AF

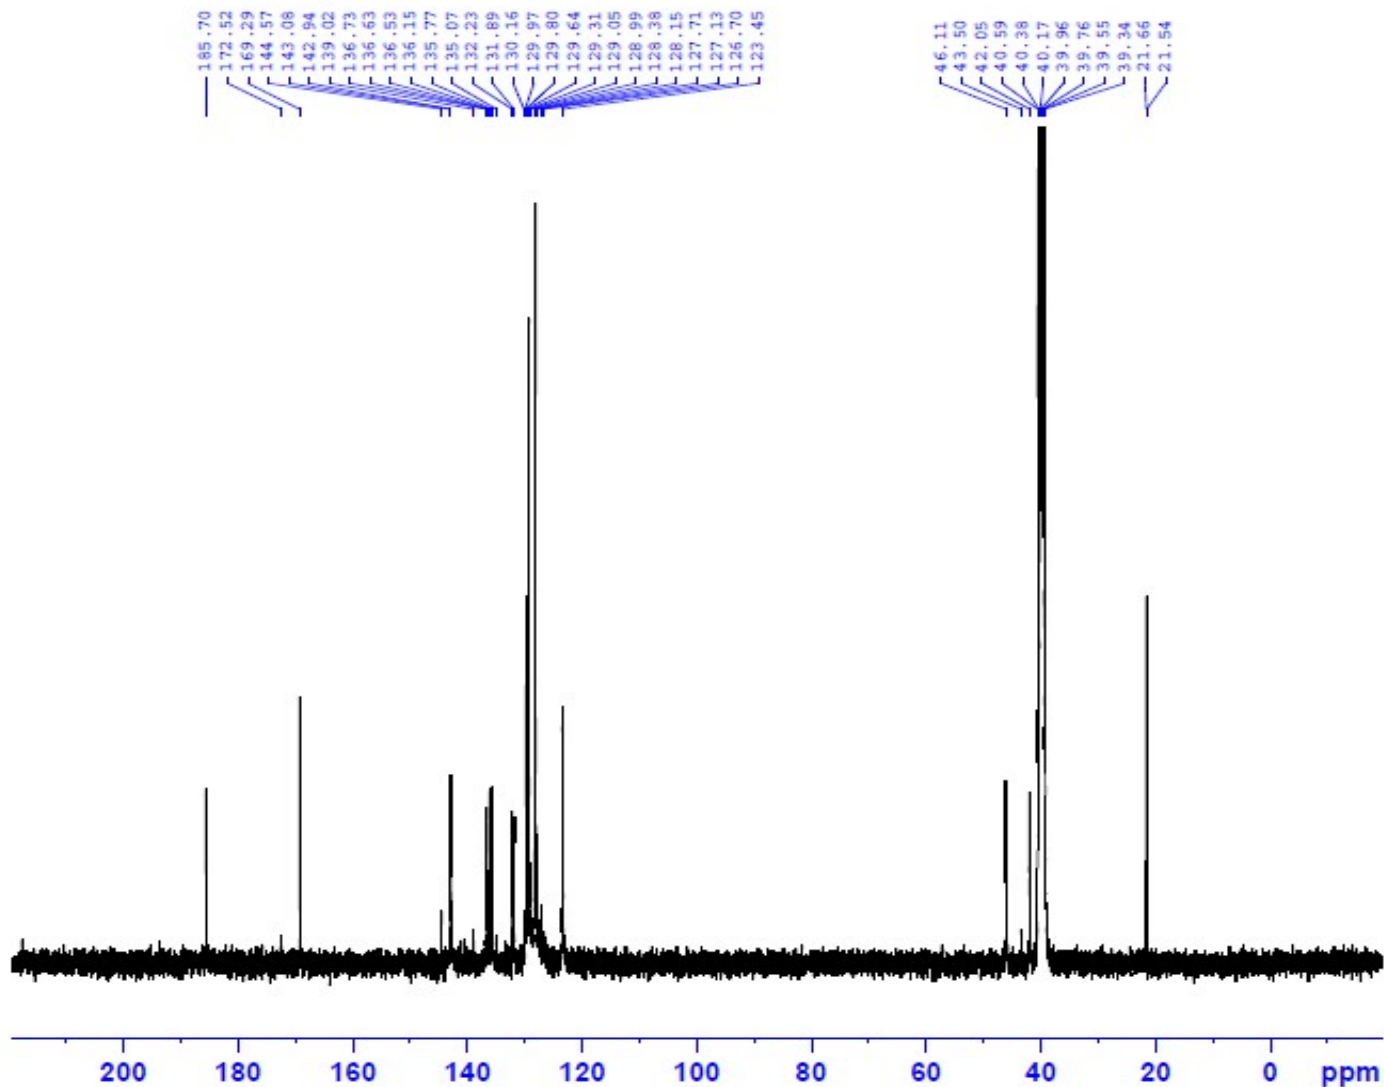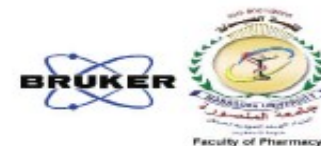

```

Current Data Parameters
NAME      Menna Abdelshaheed-Q10-CNMR-DMSO-AF
EXPNO     10
PROCNO    1

F2 - Acquisition Parameters
Date_     20210913
Time      8.15 h
INSTRUM   spect
PROBHD    X100618_0945 (
PULPROG   zgpg30
TD        65536
SOLVENT   DMSO
NS        2200
DS        4
SWH        24038.461 Hz
FIDRES    0.733596 Hz
AQ        1.2631488 sec
RG        197.77
DW        20.800 usec
DE        6.50 usec
TE        296.8 K
D1        2.00000000 sec
D11       0.03000000 sec
TD0       1
SFO1      100.6404331 MHz
NUC1      13C
P1        10.00 usec
PLW1      47.00000000 W
SFO2      400.2016000 MHz
NUC2      1H
CPDPRG2   waltz16
PCPD2     90.00 usec
PLW2      13.00000000 W
PLW12     0.29249999 W
PLW13     0.14713000 W

F2 - Processing parameters
SI        32768
SF        100.6302700 MHz
WDW       EM
SSB       0
LB        1.00 Hz
GB        0
PC        1.40
    
```

## S12: $^{13}\text{C}$ -NMR of 4b:

MennaALLAH Elshahid-E4-carbon-DMSO-D

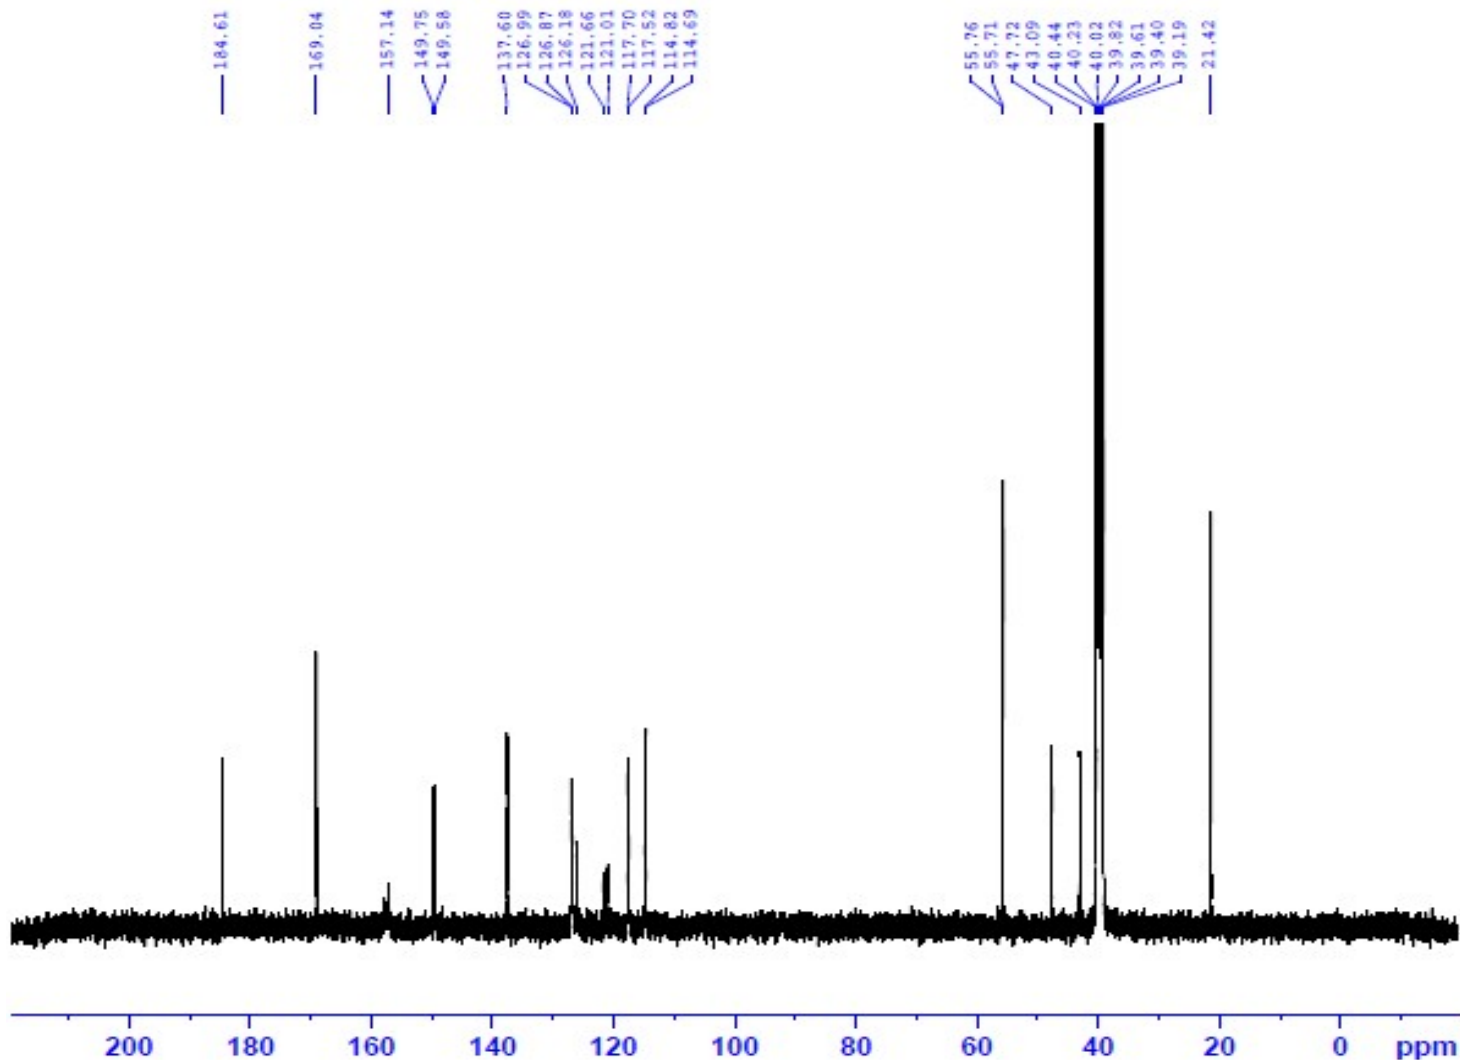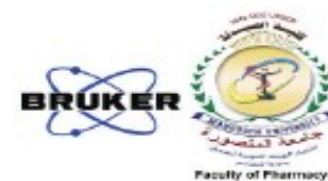

```

Current Data Parameters
NAME      MennaALLAH Elshahid-E4-carbon-DMSO-D
EXPNO    10
PROCNO    1

F2 - Acquisition Parameters
Date_    20210720
Time     14.21 h
INSTRUM  spect
PROBHD   zgpg30
PULPROG  zgpg30
TD       65536
SOLVENT  DMSO
NS       2200
DS       4
SWH      24038.461 Hz
FIDRES   0.733596 Hz
AQ       1.3631488 sec
RG       197.77
DW       20.800 usec
DE       6.50 usec
TE       293.8 K
D1       2.00000000 sec
D11      0.03000000 sec
TDO      1
SFO1     100.6404331 MHz
NUC1     13C
P1       10.00 usec
PLW1     47.00000000 W
SFO2     400.2016008 MHz
NUC2     1H
CPDPRC12 waltz16
PCPD2    90.00 usec
PLW2     13.00000000 W
PLW12    0.29249999 W
PLW13    0.14713000 W

F2 - Processing parameters
SI       32768
SF       100.6303700 MHz
WDW      EM
SSB      0
LR       1.00 Hz
GB       0
PC       1.40
    
```

### S13: <sup>13</sup>C-NMR of 5b:

Menna Mahmoud - V3 - C13 - T

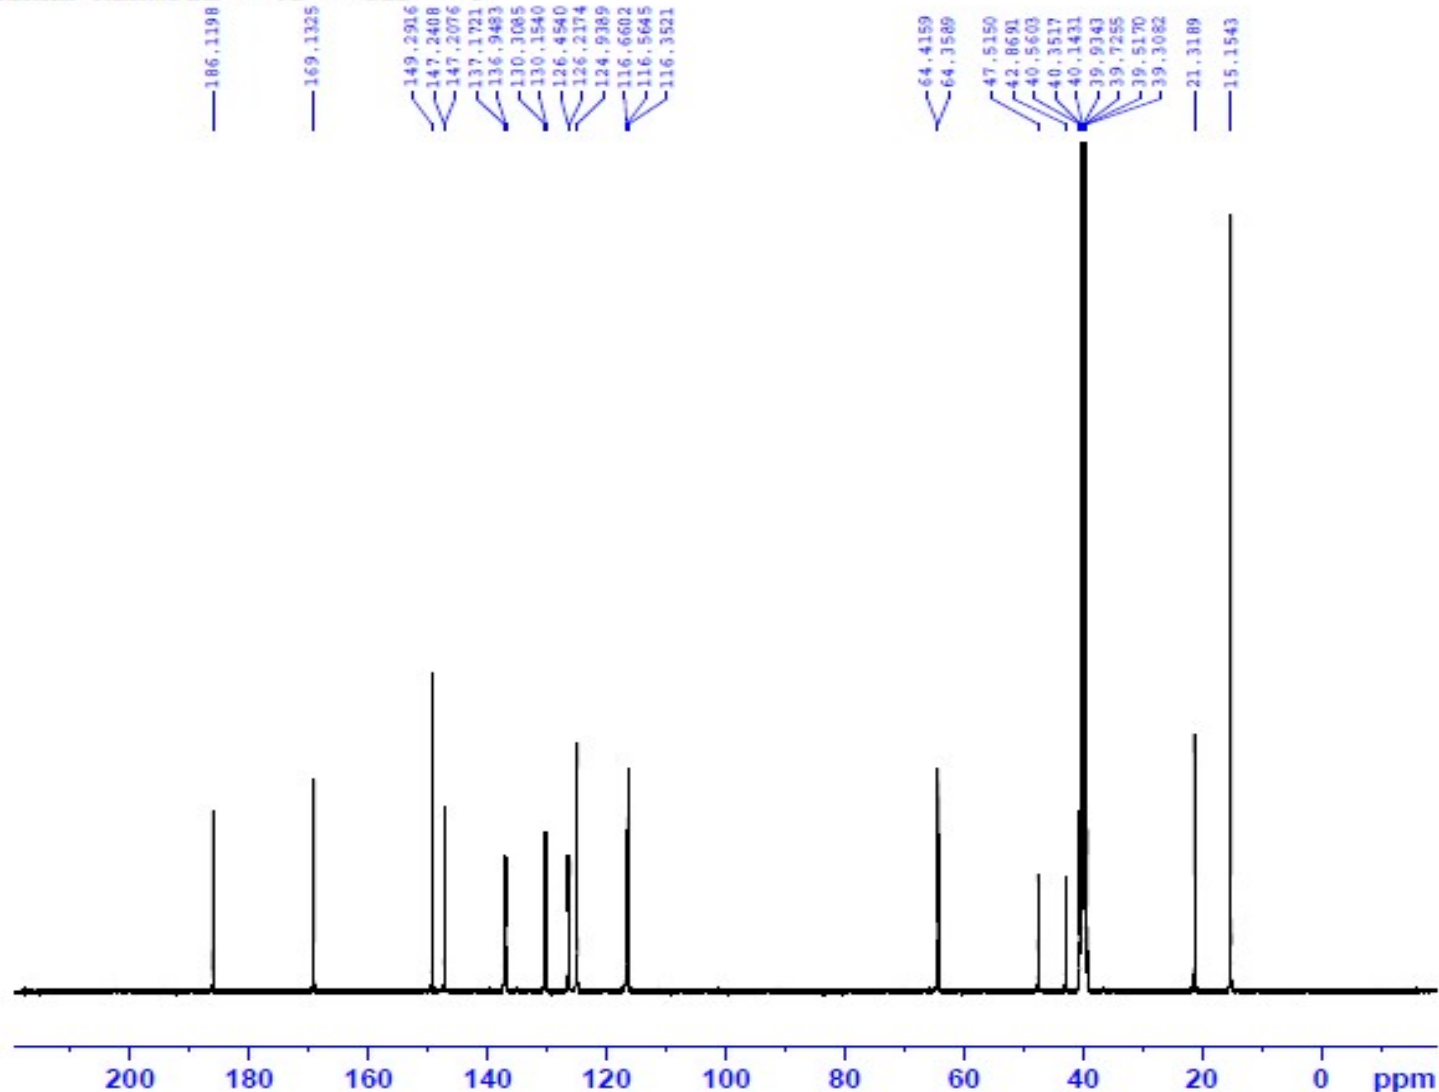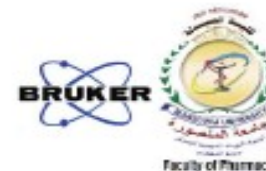

```

Current Data Parameters
NAME: Menna Mahmoud - V3 - C13 - T
EXPNO: 10
PROCNO: 1

F2 - Acquisition Parameters
Date_: 20220624
Time: 0.06 h
INSTRUM: spect
PROBHD: E106418 50Hz 1
PULPROG: zgpg30
TD: 65536
SOLVENT: DM50
NS: 2100
DS: 4
SWH: 24019.461 Hz
FIDRES: 0.713696 Hz
AQ: 1.3631488 sec
RG: 197.77
DM: 20.000 usec
DE: 6.50 usec
TE: 297.6 K
D1: 2.0000000 sec
d11: 0.0300000 sec
TDO: 1
SFO1: 100.6404311 MHz
MPC1: 13C
PI: 10.00 usec
PLM1: 47.0000000 W
SFO2: 400.2014008 MHz
MPC2: 1H
CPDPRG2: waltz16
PCPD2: 90.00 usec
PLM2: 13.0000000 W
PLM3: 0.2924998 W
PLM4: 0.14713000 W

F2 - Processing parameters
SI: 32768
SF: 100.6103700 MHz
WDW: EM
SSB: 0
LB: 1.00 Hz
GB: 0
PC: 1.40
    
```

# S14: Mass Spectrum of 3a:

RT: 4.18 - 4.50 SM: 7G

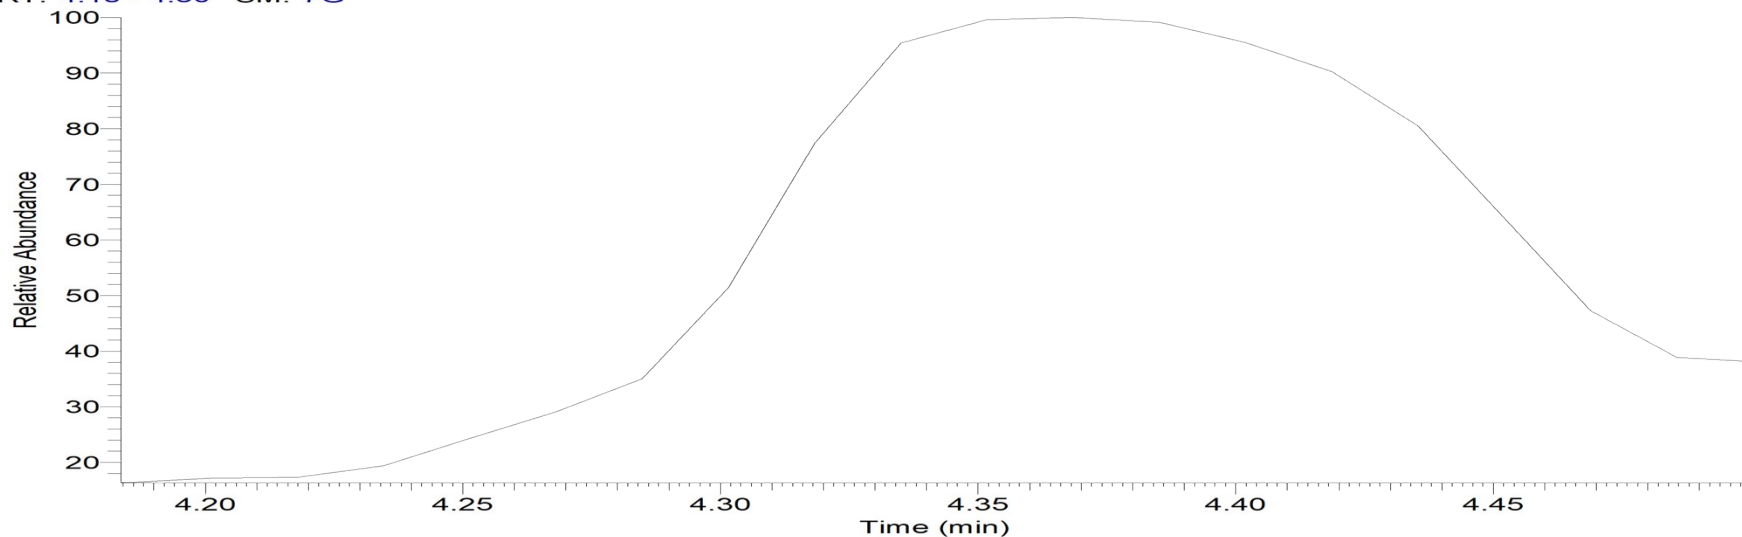

NL:  
1.35E4  
TIC MS  
menna-  
mahmoud-  
ey

menna-mahmoud-ey #110-111 RT: 1.86-1.88 AV: 2 NL: 1.64E2  
T: + c EI Full ms [40.00-1000.00]

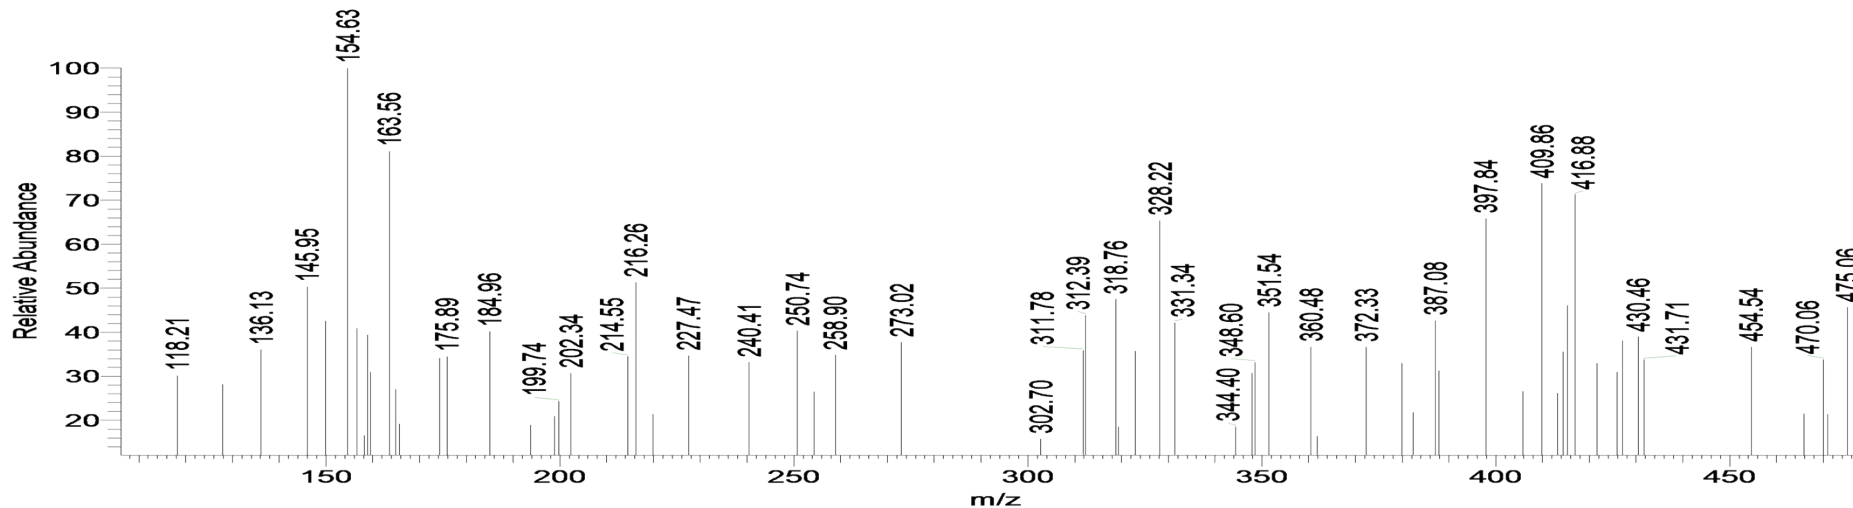

# S15: Mass Spectrum of 3c:

RT: 0.00 - 4.79 SM: 7G

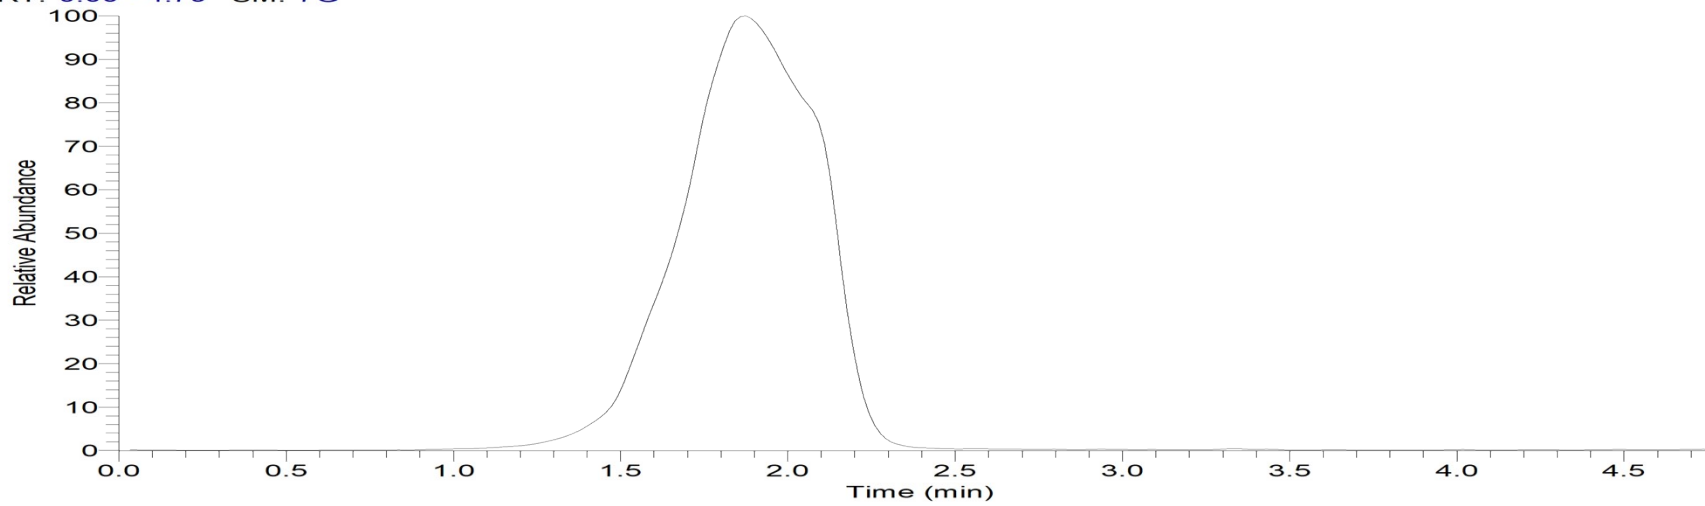

NL:  
5.13E6  
TIC MS  
menna-  
mahmoud-  
ky

menna-mahmoud-ky #154 RT: 2.59 AV: 1 NL: 5.40E2  
T: + c EI Full ms [40.00-1000.00]

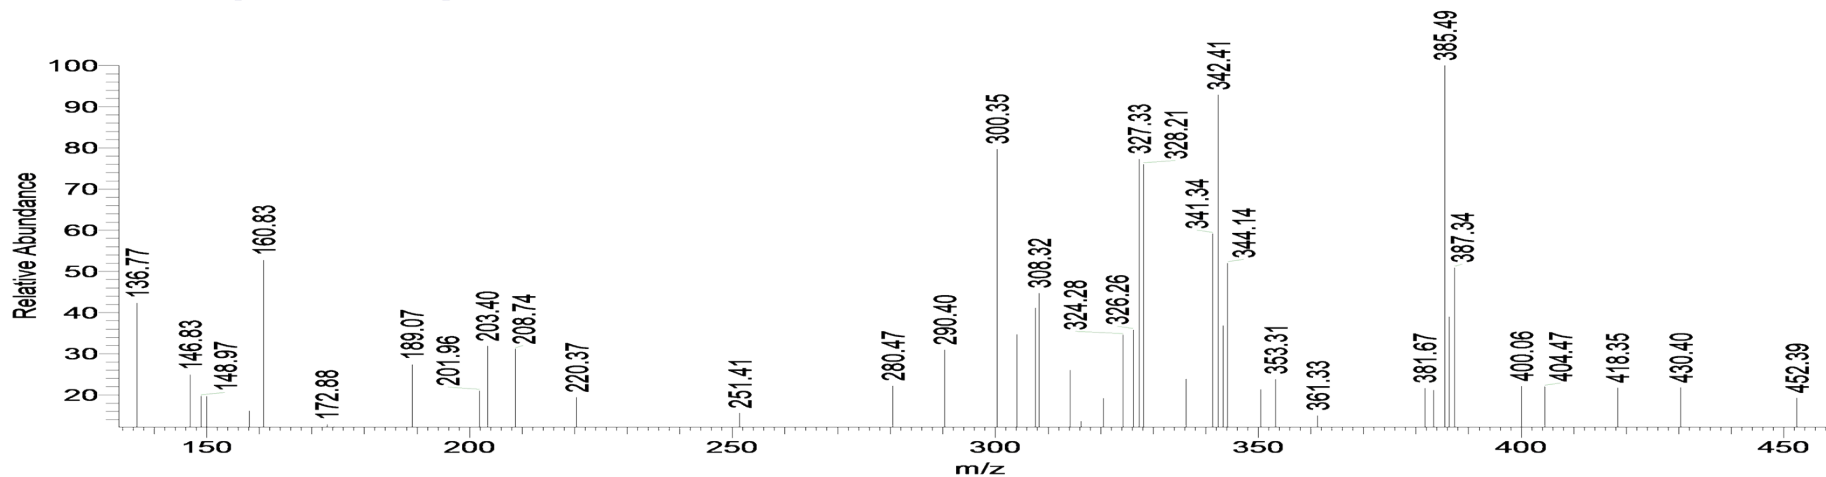



# S16: Mass Spectrum of 4b:

RT: 2.32 - 2.51 SM: 7G

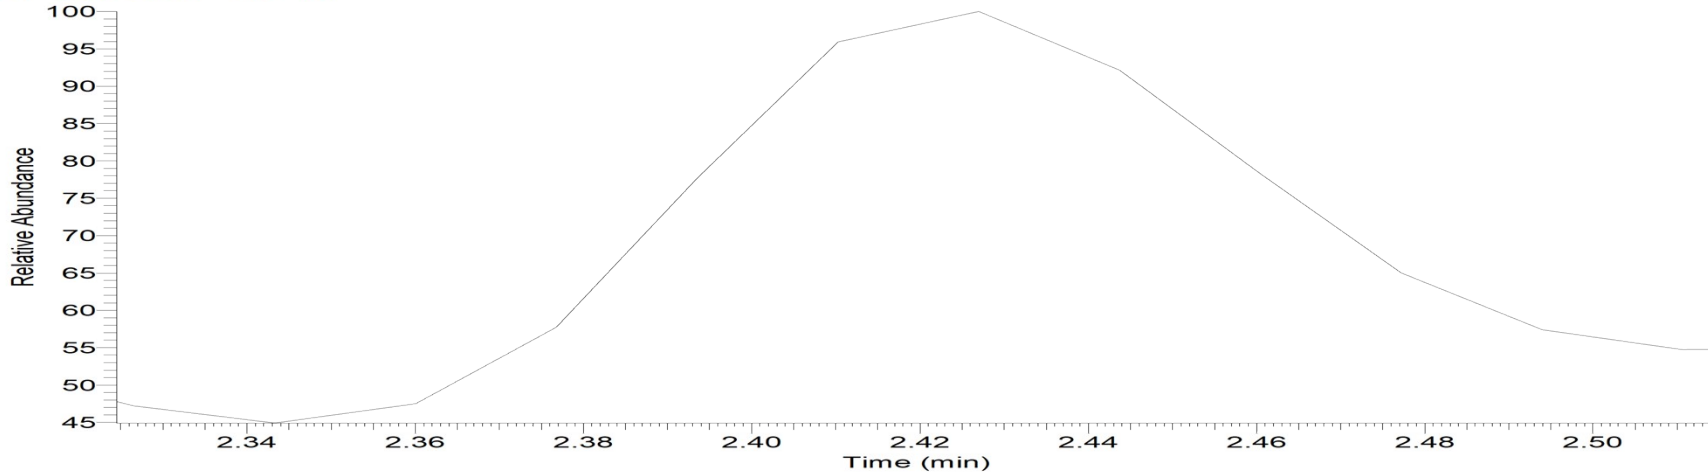

NL:  
1.76E4  
TIC MS  
menna-  
mahmoud-  
vz

menna-mahmoud-vz #120-122 RT: 2.03-2.06 AV: 3 NL: 1.61E2  
T: + c EI Full ms [40.00-1000.00]

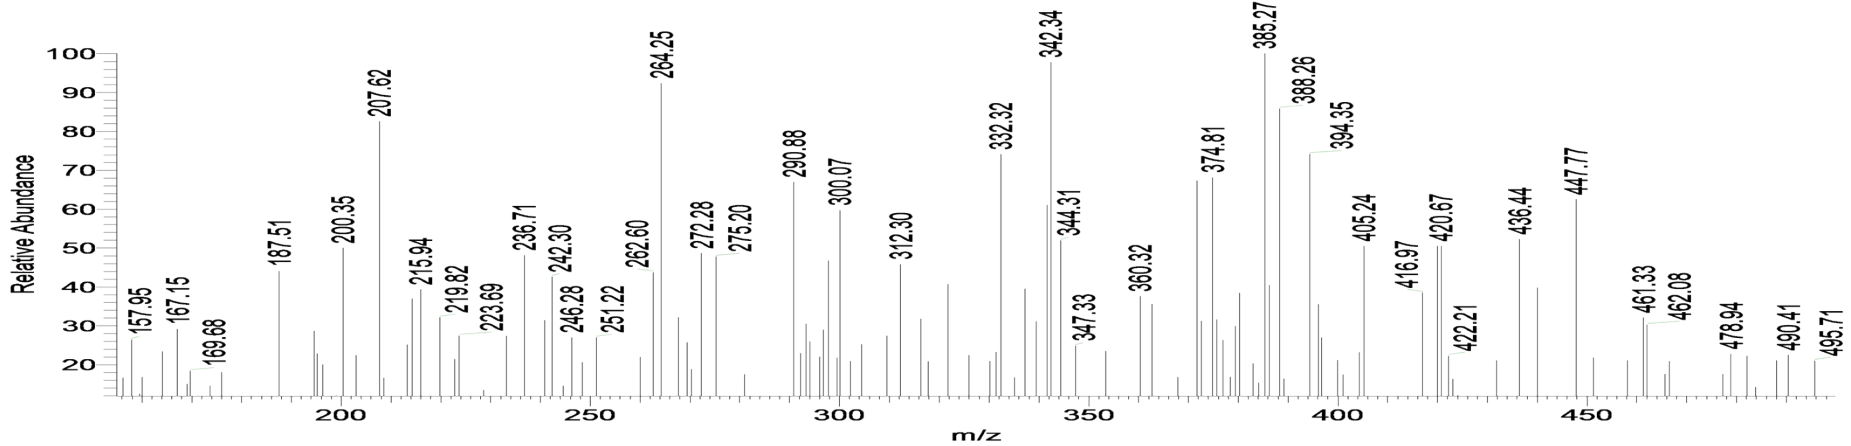

# S17: Mass Spectrum of 5a:

RT: 1.49 - 1.64 SM: 7G

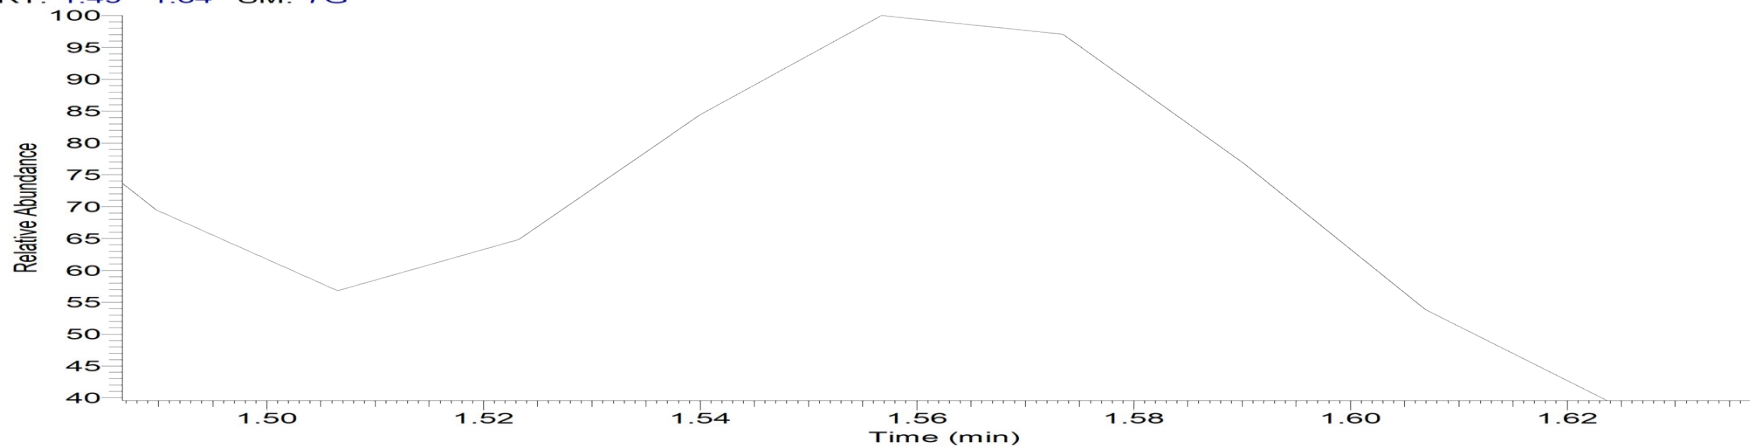

NL:  
6.17E3  
TIC MS  
menna-  
mahmoud-  
ex

menna-mahmoud-ex #29-30 RT: 0.50-0.52 AV: 2 SB: 7 1.37, 1.32-1.41 NL: 1.54E2  
T: + c EI Full ms [40.00-1000.00]

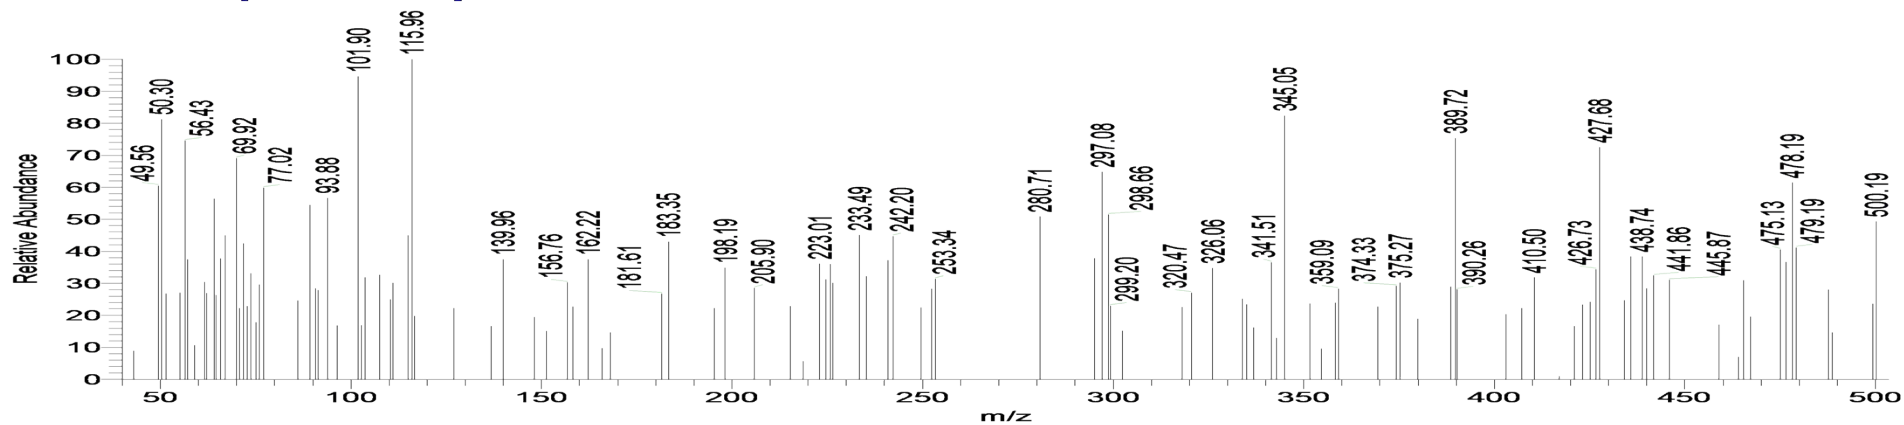

## S18: Results of Elemental Analysis:

# Al-Azhar University The Regional Center for Mycology and Biotechnology

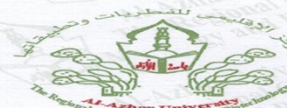

### Requester Data:

**Name:** Dr. Menna Mahmoud Abdel-Shahid  
**Authority:** Faculty of Pharmacy,  
Future University

### Sample Data:

Ten samples had been submitted for elemental analysis.

### Analysis Report:

| Sample Code    | C%    | H%   | N%    | S%    |
|----------------|-------|------|-------|-------|
| E <sub>2</sub> | 65.82 | 5.41 | 9.07  | 0     |
| E <sub>4</sub> | 63.24 | 6.08 | 8.70  | 6.53  |
| E <sub>5</sub> | 66.28 | 4.97 | 8.12  | 6.17  |
| E <sub>7</sub> | 63.27 | 6.14 | 8.71  | 6.49  |
| Q <sub>2</sub> | 67.05 | 5.97 | 8.50  | 0     |
| O <sub>4</sub> | 72.09 | 5.56 | 9.21  | 6.97  |
| S <sub>1</sub> | 62.17 | 4.70 | 4.47  | 19.61 |
| S <sub>2</sub> | 60.95 | 4.51 | 10.85 | 16.29 |
| S <sub>3</sub> | 66.08 | 5.23 | 10.29 | 15.40 |
| V <sub>2</sub> | 73.25 | 6.08 | 9.16  | 7.61  |

INVESTIGATOR

*M. Elasser*

DIRECTOR

*E. S. W.*

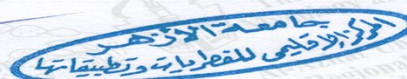

Al-Azhar University Campus - Nasr City, Cairo, Egypt.

Tel: 0202 22620373 Fax: 0202 22620373

E-mail: [rcmb@azhar.edu.eg](mailto:rcmb@azhar.edu.eg)

Website: <http://www.azhar.edu.eg.htm> \* [http://www.azhar.edu.eg/pages/fungi\\_center.htm](http://www.azhar.edu.eg/pages/fungi_center.htm)

Facebook: RCMB AZHAR

P.O. box mail: 11751 Nasr City Cairo, Egypt.

**S19: Tumor volume and body weight:**

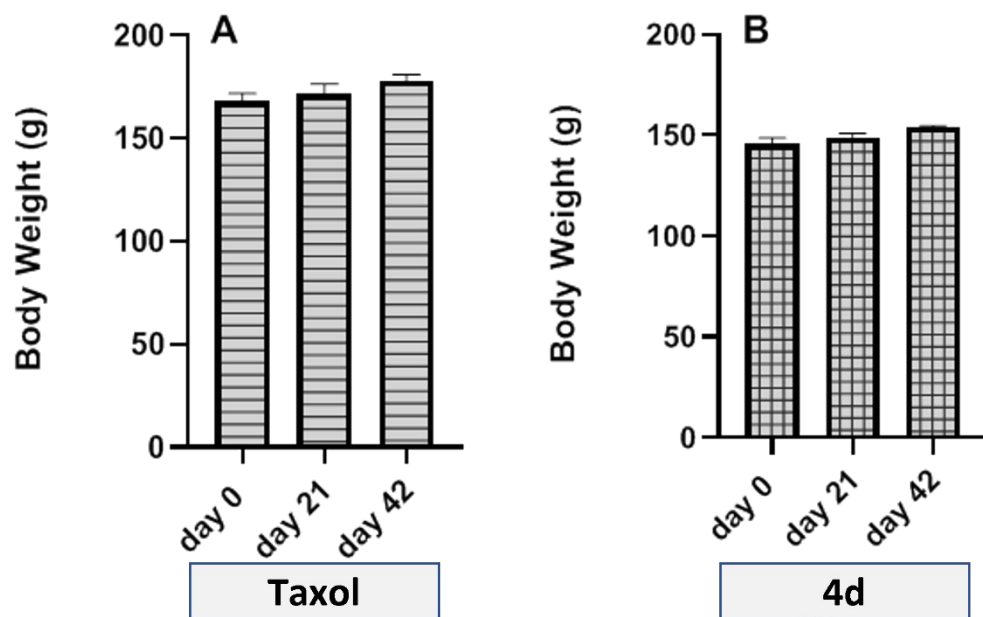

S19 figure: Rats body weight. Body weight in diseased rats after the end of the induction phase, at day 0, day 21 and day 42 of treatment with A) Taxol and B) the synthetic drug 4d. Data are presented as mean  $\pm$  SEM (n=6). Statistical analysis was carried out using one-way ANOVA followed by Tukey's Multiple comparison test at p-value  $<0.05$ . no significance difference was found between different groups.

**S20: Statistical analysis**

Values were presented as mean  $\pm$  SEM of 6 animals. Significant difference between groups was carried out using analysis of variance (ANOVA) followed by Tukey's post hoc test. Significance was taken as  $P < 0.05$ .

**S20 A: Table: Body weight in diseased rats after the end of the induction phase, at day 0, day 21 and day 42 of treatment:**

| <b>Drug/ body weight (gm)</b> | <b>Day 0</b> | <b>Day 21</b> | <b>Day 42</b> |
|-------------------------------|--------------|---------------|---------------|
| <b>Taxol</b>                  | 168 ± 3.8    | 171.6 ± 4.7   | 178.3 ± 2.7   |
| <b>4d</b>                     | 145.5 ± 3    | 148.6 ± 2.1   | 154 ± 0.8     |

**S20 B: Table: Tumor size in diseased rats after treatment at day 0, day 21 and day 42 of treatment:**

| <b>Drug/ Tumour size (cm<sup>3</sup>)</b> | <b>Day 0</b> | <b>Day 21</b> | <b>Day 42</b>  |
|-------------------------------------------|--------------|---------------|----------------|
| <b>Taxol</b>                              | 0.05 ± 0.01  | 0.17 ± 0.03*  | 0.25 ± 0.006*  |
| <b>4d</b>                                 | 0.24 ± 0.01  | 0.15 ± 0.006* | 0.056 ± 0.007* |

**S21: Results of -(C-docker interaction energy), binding mode and 2D diagram of the molecular docking studies:**

| Compound                                        | -(C-docker interaction energy) in Kcal/mol | 2D binding diagram                                                                                                                                                                                                                                                                                                                                                                                                                                                                                   | Binding mode                                                                                 |
|-------------------------------------------------|--------------------------------------------|------------------------------------------------------------------------------------------------------------------------------------------------------------------------------------------------------------------------------------------------------------------------------------------------------------------------------------------------------------------------------------------------------------------------------------------------------------------------------------------------------|----------------------------------------------------------------------------------------------|
| <p><b>Combrestatin (Reference Compound)</b></p> | <p>-38.52</p>                              | 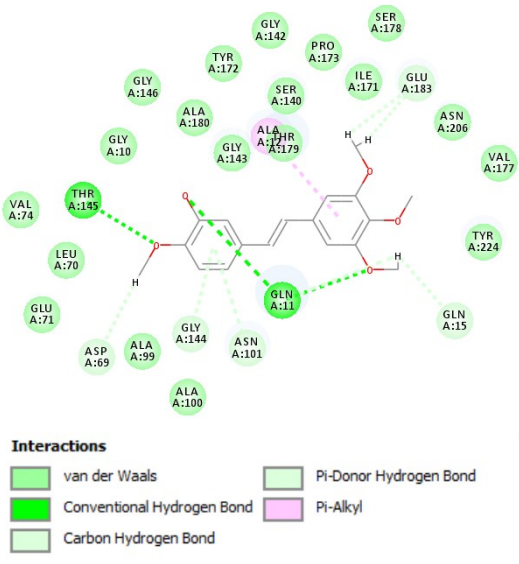 <p><b>Interactions</b></p> <ul style="list-style-type: none"> <li><span style="color: lightgreen;">■</span> van der Waals</li> <li><span style="color: red;">■</span> Conventional Hydrogen Bond</li> <li><span style="color: lightblue;">■</span> Carbon Hydrogen Bond</li> <li><span style="color: yellow;">■</span> Pi-Donor Hydrogen Bond</li> <li><span style="color: purple;">■</span> Pi-Alkyl</li> </ul> | <p>: Gln 11 (x2), Gln 15, Asp 69, Gly 144, Thr 145, Glu 183 (x2)</p> <p>Pi-Alkyl: Ala 12</p> |

|                  |               |                                                                                                                                                                                                                                                                                                   |                                                                                                                  |
|------------------|---------------|---------------------------------------------------------------------------------------------------------------------------------------------------------------------------------------------------------------------------------------------------------------------------------------------------|------------------------------------------------------------------------------------------------------------------|
| <p><b>3a</b></p> | <p>-48.05</p> | 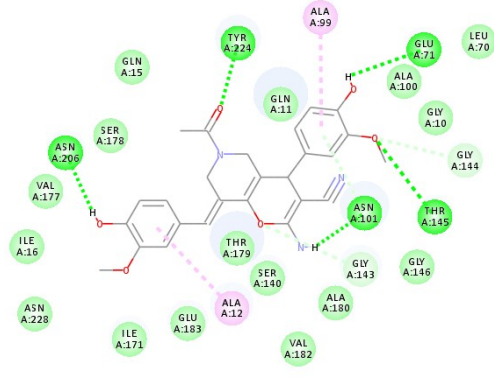 <p><b>Interactions</b></p> <ul style="list-style-type: none"> <li>van der Waals</li> <li>Conventional Hydrogen Bond</li> <li>Carbon Hydrogen Bond</li> <li>Pi-Donor Hydrogen Bond</li> <li>Pi-Alkyl</li> </ul> | <p>Gln 11, Glu 71, Asn 101 (x2), Gly 144, Thr 145, Thr 179, Asn 206, Tyr 224</p> <p>i-Alkyl: Ala 12, Ala 99</p>  |
| <p><b>3b</b></p> | <p>-48.22</p> |  <p><b>Interactions</b></p> <ul style="list-style-type: none"> <li>van der Waals</li> <li>Conventional Hydrogen Bond</li> <li>Pi-Donor Hydrogen Bond</li> <li>Alkyl</li> <li>Pi-Alkyl</li> </ul>               | <p>Gln 11, Asn 101, Glu 143, Gly 144, Thr 145, Asn 206, Tyr 224</p> <p>Ala 12, Ile 16, Ile 171 (x2), Ile 251</p> |

|                                                               |                                                   |                                                                                                                                                                                                                                                                                                                                                                                                                                                                                                                                                            |                                                    |                                                   |                                                               |                                                |                                                                                   |                                                |                                                                                                                      |
|---------------------------------------------------------------|---------------------------------------------------|------------------------------------------------------------------------------------------------------------------------------------------------------------------------------------------------------------------------------------------------------------------------------------------------------------------------------------------------------------------------------------------------------------------------------------------------------------------------------------------------------------------------------------------------------------|----------------------------------------------------|---------------------------------------------------|---------------------------------------------------------------|------------------------------------------------|-----------------------------------------------------------------------------------|------------------------------------------------|----------------------------------------------------------------------------------------------------------------------|
| <p><b>3c</b></p>                                              | <p>-45.44</p>                                     | 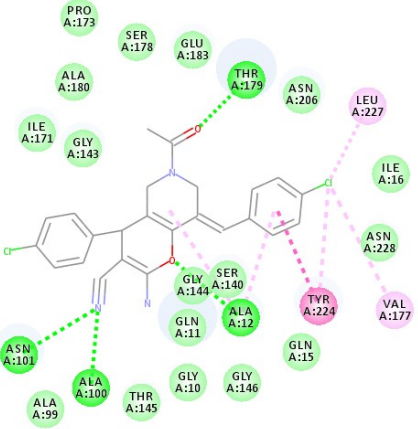 <p><b>Interactions</b></p> <table border="0"> <tr> <td><span style="color: green;">■</span> van der Waals</td> <td><span style="color: pink;">■</span> Pi-Pi Stacked</td> </tr> <tr> <td><span style="color: red;">■</span> Conventional Hydrogen Bond</td> <td><span style="color: lightpink;">■</span> Alkyl</td> </tr> <tr> <td><span style="color: blue;">■</span> Carbon Hydrogen Bond</td> <td><span style="color: purple;">■</span> Pi-Alkyl</td> </tr> </table> | <span style="color: green;">■</span> van der Waals | <span style="color: pink;">■</span> Pi-Pi Stacked | <span style="color: red;">■</span> Conventional Hydrogen Bond | <span style="color: lightpink;">■</span> Alkyl | <span style="color: blue;">■</span> Carbon Hydrogen Bond                          | <span style="color: purple;">■</span> Pi-Alkyl | <p>Gln 11, Ala 12, Ala 100, Asn 101, Thr 179</p> <p>Pi-Pi: Tyr 224</p> <p>Ala 12 (x2), Val 177, Tyr 224, Leu 277</p> |
| <span style="color: green;">■</span> van der Waals            | <span style="color: pink;">■</span> Pi-Pi Stacked |                                                                                                                                                                                                                                                                                                                                                                                                                                                                                                                                                            |                                                    |                                                   |                                                               |                                                |                                                                                   |                                                |                                                                                                                      |
| <span style="color: red;">■</span> Conventional Hydrogen Bond | <span style="color: lightpink;">■</span> Alkyl    |                                                                                                                                                                                                                                                                                                                                                                                                                                                                                                                                                            |                                                    |                                                   |                                                               |                                                |                                                                                   |                                                |                                                                                                                      |
| <span style="color: blue;">■</span> Carbon Hydrogen Bond      | <span style="color: purple;">■</span> Pi-Alkyl    |                                                                                                                                                                                                                                                                                                                                                                                                                                                                                                                                                            |                                                    |                                                   |                                                               |                                                |                                                                                   |                                                |                                                                                                                      |
| <p><b>3d</b></p>                                              | <p>-44.87</p>                                     |  <p><b>Interactions</b></p> <table border="0"> <tr> <td><span style="color: green;">■</span> van der Waals</td> <td><span style="color: pink;">■</span> Alkyl</td> </tr> <tr> <td><span style="color: red;">■</span> Conventional Hydrogen Bond</td> <td><span style="color: purple;">■</span> Pi-Alkyl</td> </tr> </table>                                                                                                                                             | <span style="color: green;">■</span> van der Waals | <span style="color: pink;">■</span> Alkyl         | <span style="color: red;">■</span> Conventional Hydrogen Bond | <span style="color: purple;">■</span> Pi-Alkyl | <p>Hydrogen bond: Thr 179, Tyr 224</p> <p>Alkyl: Ala 12 (x2), Ala 99, Ile 171</p> |                                                |                                                                                                                      |
| <span style="color: green;">■</span> van der Waals            | <span style="color: pink;">■</span> Alkyl         |                                                                                                                                                                                                                                                                                                                                                                                                                                                                                                                                                            |                                                    |                                                   |                                                               |                                                |                                                                                   |                                                |                                                                                                                      |
| <span style="color: red;">■</span> Conventional Hydrogen Bond | <span style="color: purple;">■</span> Pi-Alkyl    |                                                                                                                                                                                                                                                                                                                                                                                                                                                                                                                                                            |                                                    |                                                   |                                                               |                                                |                                                                                   |                                                |                                                                                                                      |



4a

-50.74

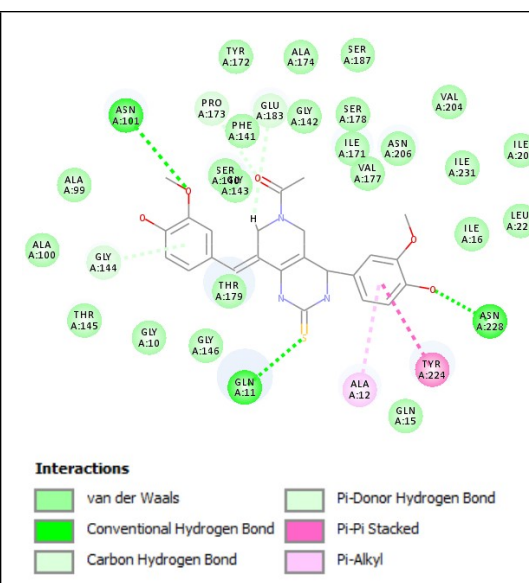

Gln 11, Asn 101, Phe 141, Gly 144, Glu 183, Asn 228

Pi-Pi: Tyr 224

Pi-Alkyl: Ala 12

4b

-48.59

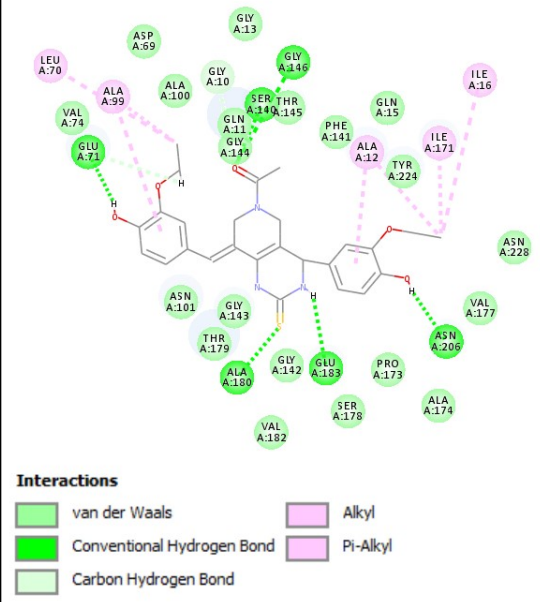

: Gln 11, Glu 71, Ser 140, Gly  
179, Ala 180, Glu 183, Asn 226  
: Ala 112 (x2), Ile 16, Leu 70,  
Ala 99 (x2), Ile 171

|                                                                |                                                 |                                                                                                                                                                                                                                                                                                                                                                                                                                                                                                                                                              |                                                    |                                                 |                                                               |                                                |                                                                |                                                |                                                                                                                                                       |
|----------------------------------------------------------------|-------------------------------------------------|--------------------------------------------------------------------------------------------------------------------------------------------------------------------------------------------------------------------------------------------------------------------------------------------------------------------------------------------------------------------------------------------------------------------------------------------------------------------------------------------------------------------------------------------------------------|----------------------------------------------------|-------------------------------------------------|---------------------------------------------------------------|------------------------------------------------|----------------------------------------------------------------|------------------------------------------------|-------------------------------------------------------------------------------------------------------------------------------------------------------|
| <p><b>5a</b></p>                                               | <p>-47.65</p>                                   | 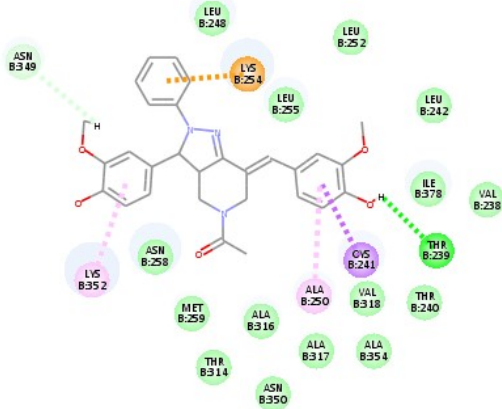 <p><b>Interactions</b></p> <table border="0"> <tr> <td><span style="color: green;">■</span> van der Waals</td> <td><span style="color: orange;">■</span> Pi-Cation</td> </tr> <tr> <td><span style="color: red;">■</span> Conventional Hydrogen Bond</td> <td><span style="color: purple;">■</span> Pi-Sigma</td> </tr> <tr> <td><span style="color: lightgreen;">■</span> Carbon Hydrogen Bond</td> <td><span style="color: pink;">■</span> Pi-Alkyl</td> </tr> </table> | <span style="color: green;">■</span> van der Waals | <span style="color: orange;">■</span> Pi-Cation | <span style="color: red;">■</span> Conventional Hydrogen Bond | <span style="color: purple;">■</span> Pi-Sigma | <span style="color: lightgreen;">■</span> Carbon Hydrogen Bond | <span style="color: pink;">■</span> Pi-Alkyl   | <p>Thr 259, Asn 49<br/> Pi-Cation: Lys 254<br/> Pi-Sigma: Cys 241<br/> Alkyl: Ala 250, Lys 352</p>                                                    |
| <span style="color: green;">■</span> van der Waals             | <span style="color: orange;">■</span> Pi-Cation |                                                                                                                                                                                                                                                                                                                                                                                                                                                                                                                                                              |                                                    |                                                 |                                                               |                                                |                                                                |                                                |                                                                                                                                                       |
| <span style="color: red;">■</span> Conventional Hydrogen Bond  | <span style="color: purple;">■</span> Pi-Sigma  |                                                                                                                                                                                                                                                                                                                                                                                                                                                                                                                                                              |                                                    |                                                 |                                                               |                                                |                                                                |                                                |                                                                                                                                                       |
| <span style="color: lightgreen;">■</span> Carbon Hydrogen Bond | <span style="color: pink;">■</span> Pi-Alkyl    |                                                                                                                                                                                                                                                                                                                                                                                                                                                                                                                                                              |                                                    |                                                 |                                                               |                                                |                                                                |                                                |                                                                                                                                                       |
| <p><b>5b</b></p>                                               | <p>-54.83</p>                                   |  <p><b>Interactions</b></p> <table border="0"> <tr> <td><span style="color: green;">■</span> van der Waals</td> <td><span style="color: orange;">■</span> Pi-Sulfur</td> </tr> <tr> <td><span style="color: red;">■</span> Conventional Hydrogen Bond</td> <td><span style="color: pink;">■</span> Alkyl</td> </tr> <tr> <td><span style="color: lightgreen;">■</span> Carbon Hydrogen Bond</td> <td><span style="color: purple;">■</span> Pi-Alkyl</td> </tr> </table>   | <span style="color: green;">■</span> van der Waals | <span style="color: orange;">■</span> Pi-Sulfur | <span style="color: red;">■</span> Conventional Hydrogen Bond | <span style="color: pink;">■</span> Alkyl      | <span style="color: lightgreen;">■</span> Carbon Hydrogen Bond | <span style="color: purple;">■</span> Pi-Alkyl | <p>Lys 254, Asn 258, Asn 349, Asn 350, Thr 353<br/> Pi-Sulfur: Met 259<br/> Alkyl: Cys 241 (x2), Leu 248, Ala 318, Lys 352, Ala 354 (x2), Ile 378</p> |
| <span style="color: green;">■</span> van der Waals             | <span style="color: orange;">■</span> Pi-Sulfur |                                                                                                                                                                                                                                                                                                                                                                                                                                                                                                                                                              |                                                    |                                                 |                                                               |                                                |                                                                |                                                |                                                                                                                                                       |
| <span style="color: red;">■</span> Conventional Hydrogen Bond  | <span style="color: pink;">■</span> Alkyl       |                                                                                                                                                                                                                                                                                                                                                                                                                                                                                                                                                              |                                                    |                                                 |                                                               |                                                |                                                                |                                                |                                                                                                                                                       |
| <span style="color: lightgreen;">■</span> Carbon Hydrogen Bond | <span style="color: purple;">■</span> Pi-Alkyl  |                                                                                                                                                                                                                                                                                                                                                                                                                                                                                                                                                              |                                                    |                                                 |                                                               |                                                |                                                                |                                                |                                                                                                                                                       |

## S22: Table Results of Dynamic Simulation Cascades of Combrestatin-tubulin complex:

| Name         | Stage         | Forcefield | Start Time (ps) | End Time (ps) | Initial Potential Energy (kcal/mol) | Total Energy (kcal/mol) | Potential Energy (kcal/mol) | Kinetic Energy (kcal/mol) | Temperature (K) | Van der Waals Energy (kcal/mol) | Electrostatic Energy (kcal/mol) | Initial RMS Gradient (kcal/(mol x A)) | Final RMS Gradient (kcal/(mol x A)) |
|--------------|---------------|------------|-----------------|---------------|-------------------------------------|-------------------------|-----------------------------|---------------------------|-----------------|---------------------------------|---------------------------------|---------------------------------------|-------------------------------------|
| Combrestatin | Minimization  | CHARMm     |                 |               | 5.807E+10                           |                         | -18208.904                  |                           |                 | -2078.803                       | -25944.82                       | 1.509E+10                             | 0.898                               |
| Combrestatin | Minimization2 | CHARMm     |                 |               | -18208.904                          |                         | -22101.759                  |                           |                 | -3118.442                       | -18432.404                      | 0.898                                 | 0.097                               |
| Combrestatin | Heating       | CHARMm     | 0               | 4             | -22101.759                          | -20536.987              | -21451.036                  | 914.05                    | 54.267          | -3109.562                       | -18297.805                      | 1.574                                 | 7.692                               |
| Combrestatin | Equilibration | CHARMm     | 4               | 14            | -21451.036                          | -12114.933              | -17265.263                  | 5150.33                   | 305.777         | -2505.498                       | -16660.435                      | 7.692                                 | 18.805                              |
| Combrestatin | Production    | CHARMm     | 14              | 24            | -17265.263                          | -12289.69               | -17370.043                  | 5080.352                  | 301.622         | -2433.721                       | -16272.189                      | 18.805                                | 18.557                              |

## S23: Table Results of Dynamic Simulation Cascades of 3b-tubulin complex:

| Name | Stage         | Forcefield  | Start Time (ps) | End Time (ps) | Initial Potential Energy (kcal/mol) | Total Energy (kcal/mol) | Potential Energy (kcal/mol) | Kinetic Energy (kcal/mol) | Temperature (K) | Van der Waals Energy (kcal/mol) | Electrostatic Energy (kcal/mol) | Initial RMS Gradient (kcal/(mol x A)) | Final RMS Gradient (kcal/(mol x A)) |
|------|---------------|-------------|-----------------|---------------|-------------------------------------|-------------------------|-----------------------------|---------------------------|-----------------|---------------------------------|---------------------------------|---------------------------------------|-------------------------------------|
| 3b   | Minimization  | 1SA1-CHARMm |                 |               | 1.027E+13                           |                         | -15002.708                  |                           |                 | -1101.505                       | -25887.553                      | 3.238E+12                             | 0.948                               |
| 3b   | Minimization2 | 1SA1-CHARMm |                 |               | -15002.708                          |                         | -18304.957                  |                           |                 | -1967.835                       | -18592.248                      | 0.948                                 | 0.146                               |
| 3b   | Heating       | 1SA1-CHARMm | 0               | 4             | -18304.957                          | -16707.358              | -17616.758                  | 909.4                     | 53.656          | -1962.481                       | -18449.633                      | 1.615                                 | 7.674                               |
| 3b   | Equilibration | 1SA1-CHARMm | 4               | 14            | -17616.758                          | -8288.681               | -13461.538                  | 5172.857                  | 305.206         | -1186.345                       | -16416.55                       | 7.674                                 | 18.786                              |
| 3b   | Production    | 1SA1-CHARMm | 14              | 24            | -13461.538                          | -8453.329               | -13606.281                  | 5152.952                  | 304.031         | -1324.499                       | -16147.583                      | 18.786                                | 18.567                              |
